# Supplementary material for: Clinical value of serum polyunsaturated fatty acids in patients with gastric polyps
Source: PeerJ. 2024 May 20;12:e17413. doi: 10.7717/peerj.17413 (PMC11114109; doi:10.7717/peerj.17413)
Supplement: Supplemental Information 2 [file peerj-12-17413-s002.xlsx]

## Sheet: 1月
样本信息									检测结果
接收日期	样本姓名	性别	年龄	住院号	病区	床位号	科室	检测日期	十六碳一烯酸（C16：1）	十八碳一烯酸（C18：1）	十八碳二烯酸（C18：2）	α-十八碳三烯酸（α-C18：3）	γ-十八碳三烯酸（γ-C18：3）	二十碳一烯酸（C20：1）	二十碳四烯酸（C20：4）	二十碳五烯酸（C20：5）	ω-3-二十二碳五烯酸（ω-3-C22：5）	ω-6-二十二碳五烯酸（ω-6-C22：5）	二十二碳六烯酸（C22：6）	AA/DHA	AA/EPA	ω-6/ω-3
2019.01.24	黄桂华	女	64	0101281929	501消化	41	消化科	2019.01.24	24.1	605	497	18.2	3.11	6.85	34.5	1.68	2.71	1.94	25.1	1.3745	20.5357	11.2508
2019.01.25	王丽萍	女	36	0101130318	501消化	36	消化科	2019.01.29	27.7	188	130	15.2	2.53	1.98	19.6	1.5	1.16	0.581	10.7	1.83178	13.0667	5.34702
2019.01.25	陈富仁	男	81	0101282163	501消化	38	消化科	2019.01.29	16.9	156	80.6	6.66	0.569	2.21	15.6	0.594	1.15	0.451	6.04	2.58278	26.2626	6.73082
2019.01.26	高宗和	男	56	0101272023	501消化	37	消化科	2019.01.29	7.04	167	180	6.09	0.594	2.02	42.6	1.11	1.7	1.64	13.8	3.08696	38.3784	9.90458
2019.01.26	胡凡	女	76	0000400593	501消化	45	消化科	2019.01.29	79.8	508	315	15.4	0.867	5.24	49.8	0.748	3.09	2.5	21.7	2.29493	66.5775	8.99328
2019.01.26	张佩石	男	81	0101248496	501消化	39	消化科	2019.01.29	14.5	173	152	10.6	1.7	1.8	22.1	1.05	1.23	1.11	8.48	2.60613	21.0476	8.2823
2019.01.26	程福华	男	70	0101048372	501消化	40	消化科	2019.01.29	12.4	298	142	12	1.73	2.64	23	0.336	0.989	0.517	7.46	3.08311	68.4524	8.04652
2019.01.28	章从锡	男	62	0101282478	501消化	10	消化科	2019.01.29	24.8	184	97.8	24.7	0.41	16.4	35.4	2.16	2.02	0.809	12.7	2.7874	16.3889	3.23278
2019.01.28	吕守贵	男	65	0101282505	501消化	8	消化科	2019.01.29	28.9	381	154	14.3	2.68	4.59	26.3	1.85	2.29	1.62	14.1	1.86525	14.2162	5.67302
2019.01.28	吴国毅	男	66	0101252145	501消化	36	消化科	2019.01.29	23.9	259	145	7.35	2.48	3.26	10.3	0.861	2.9	0.848	8.6	1.19767	11.9628	8.04769
2019.01.28	王鹏	男	44	0101282510	501消化	9	消化科	2019.01.29	21	319	180	12.5	2.27	4.05	35.7	1.67	2.17	3.29	17	2.1	21.3772	6.63647
2019.01.28	熊小平	女	60	0000349532	501消化	27	消化科	2019.01.29	9.26	254	230	3.71	2.2	2.27	22.4	0.498	1.55	0.954	10.8	2.07407	44.9799	15.4339
2019.01.28	朱力伟	男	30	0101282559	501消化	35	消化科	2019.01.29	6.97	79.1	61.9	4.53	1.59	1.03	27.9	2.12	1.24	0.807	16.7	1.67066	13.1604	3.74937
2019.01.29	徐峰	女	28	0101139085	501消化	26	消化科	2019.01.29	15.7	142	141	7.94	1.44	1.62	31.1	0.527	1.1	2.23	9.35	3.3262	59.0133	9.29164
2019.01.29	戴遐文	男	75	0101267864	510消化1	37	消化科	2019.01.31	5.83	60.8	55.1	3.77	0.984	0.539	23.7	2.23	1.69	1.01	9.61	2.46618	10.6278	4.67017
2019.01.30	陆淳英	女	77	0101282504	501消化	16	消化科	2019.01.31	16.6	219	180	8.09	1.16	1.94	39	1.02	2.01	2.33	22	1.77273	38.2353	6.71769
2019.01.30	徐菊兴	男	56	0000419025	501消化	38	消化科	2019.01.31	3.32	102	137	5.63	0.795	1.29	42.3	1.84	2.39	1.46	25.5	1.65882	22.9891	5.13447
2019.01.30	陶新梅	女	55	0101146726	501消化	25	消化科	2019.01.31	2.3	62.5	94.3	2.41	0.376	0.644	32.1	2.87	1.7	0.974	27.2	1.18015	11.1847	3.73757

## Sheet: 2月
样本信息											检测结果
接收日期	样本姓名	性别	年龄	住院号	病区	床位号	条形码编号	科室	送检医生	检测日期	十六碳一烯酸（C16：1）	十八碳一烯酸（C18：1）	十八碳二烯酸（C18：2）	α-十八碳三烯酸（α-C18：3）	γ-十八碳三烯酸（γ-C18：3）	二十碳一烯酸（C20：1）	二十碳四烯酸（C20：4）	二十碳五烯酸（C20：5）	ω-3-二十二碳五烯酸（ω-3-C22：5）	ω-6-二十二碳五烯酸（ω-6-C22：5）	二十二碳六烯酸（C22：6）	AA/DHA	AA/EPA	ω-6/ω-3
2019.02.01	钱湘霆	女	77	0101283108	501消化	15		消化科		2019.02.02	17.4	404	286	8.85	1.52	5.92	64.6	1.81	4.69	3.64	42	1.5381	35.6906	6.20331
2019.02.01	颜新	男	41	0000332587	501消化	9		消化科		2019.02.02	15.2	174	187	6.31	2.15	2.14	73.9	2.62	3.14	2.01	21.2	3.48585	28.2061	7.96694
2019.02.10	胡凡	女	76	0000400593	501消化	27		消化科	欧希龙	2019.02.11	88.7	461	325	12.2	2.88	3.33	25.2	0.622	2.51	1.8	15.6	1.61538	40.5145	11.4729
2019.02.10	俞璐璐	女	73	0101150149	501消化	15		消化科	欧希龙	2019.02.11	17.7	276	262	9.68	2.62	1.37	41.1	0.978	2.52	1.34	23.6	1.74153	42.0245	8.34901
2019.02.10	顾金红	男	83	0101283469	501消化	35		消化科	欧希龙	2019.02.11	61.1	418	265	10.7	2.6	2.78	38.9	0.84	2.93	1.6	18.7	2.08021	46.3095	9.28851
2019.02.10	张燕龙	男	42	0101067196	501消化	9		消化科	欧希龙	2019.02.11	11.5	281	256	10	1.68	2.27	53.4	1.2	3.31	1.44	22.9	2.33188	44.5	8.35392
2019.02.10	张成云	男	75	0101283318	501消化	21		消化科	欧希龙	2019.02.11	49.2	612	587	16.2	3.33	3.48	40.5	0.54	3.02	2.21	15.3	2.64706	75	18.0559
2019.02.10	徐伟	男	35	0101283309	501消化	10		消化科	欧希龙	2019.02.11	20.9	407	272	8.65	1.4	4.03	64	1.34	4	2.01	30.4	2.10526	47.7612	7.64609
2019.02.11	吴加佳	女	30	0101283713	501消化	25		消化科	欧希龙	2019.02.11	13.8	269	233	11	1.65	2.01	27	1.68	2.65	1.27	25.4	1.06299	16.0714	6.45519
2019.02.11	唐厚翠	女	52	0101283815	501消化	26		消化科	欧希龙	2019.02.11	8.1	229	213	6.22	1.7	1.64	35.4	1.13	2.4	1.28	18.3	1.93443	31.3274	8.96185
2019.02.11	王家骧	男	71	0101283467	501消化	40		消化科	欧希龙	2019.02.14	7.24	143	116	2.22	0.452	1.1	43	1.02	1.54	2.11	18.6	2.31183	42.1569	6.91027
2019.02.12	倪君	女	31	0101128091	501消化	19		消化科	欧希龙	2019.02.14	19.4	237	174	9.27	1.86	2.92	63.4	3.8	2.56	1.94	29.2	2.17123	16.6842	5.38033
2019.02.12	吕承柱	男	71	0101284110	501消化	46		消化科	欧希龙	2019.02.14	16.6	179	251	7.01	1.07	2.59	65.6	2.14	2.07	1.86	31.1	2.10932	30.6542	7.55033
2019.02.12	藏明香	女	66	0101253388	501消化1	20		消化科	欧希龙	2019.02.14	33.2	226	183	5.87	1.43	1.46	32.2	0.546	1.05	2.57	16.1	2	58.9744	9.30154
2019.02.13	傅非	女	64	0101284170	501消化	21		消化科	欧希龙	2019.02.14	25.5	244	237	6.52	1.78	1.53	60.4	2.96	3.26	3.11	31.2	1.9359	20.4054	6.87961
2019.02.14	仇秀珍	女	74	0101199572	501消化	15	1008185719	消化科	欧希龙	2019.02.14	12.3	229	191	5.34	0.789	1.42	61.9	2.39	2.21	2.14	28.1	2.20285	25.8996	6.72526
2019.02.15	谭国杰	女	81	0101283205	501消化	25	1008193333	消化科	欧希龙	2019.02.18	19.1	416	356	14.5	1.62	4.27	35.2	0.641	3.56	2.85	18.2	1.93407	54.9142	10.7225
2019.02.15	周曼丽	女	84	0000385354	501消化	26	1008200265	消化科	欧希龙	2019.02.18	4.02	123	189	3.52	1.21	1.27	65.8	3.74	2.96	1.08	21.9	3.00457	17.5936	8.00405
2019.02.18	倪学金	男	62	0101285139	501消化	46	1008209524	消化科	欧希龙	2019.02.18	21.3	392	282	10.4	1.04	3.93	60.8	2.59	4.84	3.68	36.8	1.65217	23.4749	6.36134
2019.02.19	魏辉	男	55	0101119913	501消化	43	1008215163	消化科	欧希龙	2019.02.21	6.19	248	196	7.16	1.47	2.35	45.9	1.62	3.23	1.83	19.2	2.39062	28.3333	7.85646
2019.02.20	王纯强	男	57	0000379811	501消化	42	1008226496	消化科	欧希龙	2019.02.21	5.49	174	155	13.2	1.27	2.05	48.2	4.25	4.65	2.33	29.4	1.63946	11.3412	4.01553
2019.02.20	邵学滨	男	67	0101275914	501消化1	37	1008221862	消化科	欧希龙	2019.02.21	8.13	199	198	9.56	1.41	1.94	41	6.47	5.29	2.16	39.6	1.03535	6.33694	3.98178
2019.02.20	王恒来	男	65	0000464693	501消化1	43	1008225457	消化科	欧希龙	2019.02.21	2.36	89.2	112	3.16	0.613	0.666	34.4	1.62	1.4	0.815	12	2.86667	21.2346	8.13135
2019.02.22	董保珍	女	73	0101285834	501消化1	25	1008236189	消化科	欧希龙	2019.02.25	31.7	473	234	24.1	3.09	9.33	36.8	3.2	4.54	1.69	15.4	2.38961	11.5	5.83362
2019.02.22	芦贤福	男	63	0101286137	501消化1	42	1008242634	消化科	欧希龙	2019.02.25	28.5	528	335	14.3	1.44	6.69	23.3	0.631	2.11	1.06	9.97	2.33701	36.9255	13.3575
2019.02.22	李树芳	女	88	0101251439	501消化1	26	1008241962	消化科	欧希龙	2019.02.25	9.4	180	187	5.64	1.48	1.98	29.9	1.64	2.08	1.58	17.9	1.67039	18.2317	8.06897
2019.02.25	姜德喜	男	65	0000365197	501消化1	39	1008253672	消化科	欧希龙	2019.02.25	13	169	138	6.2	0.751	1.72	36	9.25	3.86	0.894	20.1	1.79104	3.89189	4.45686
2019.02.25	邹宁玲	女	53	0101091621	501消化1	13	1008253613	消化科	欧希龙	2019.02.25	6.25	136	146	5.28	1.02	1.27	22.7	2.02	1.37	1.07	12.5	1.816	11.2376	8.06755
2019.02.26	陆爱华	女	60	0101177332	501消化1	15	1008256915	消化科	欧希龙	2019.02.27	5.81	75.9	77.9	3.47	0.417	0.831	22.3	0.948	1.79	1.03	15.4	1.44805	23.5232	4.70414
2019.02.26	刘成孝	男	53	0101286907	501消化1	10	1008257663	消化科	欧希龙	2019.02.27	12.8	261	137	10.9	1.41	2.64	32.1	1.36	2.72	1.31	13	2.46923	23.6029	6.14081
2019.02.26	王国华	男	67	0000406401	501消化1	46	1008261731	消化科	欧希龙	2019.02.27	1.99	39.8	54.2	1.66	0.394	0.603	26.2	0.576	1.19	0.395	8.75	2.99429	45.4861	6.66795
2019.02.26	杨淑玖	女	82	0101150082	501消化1	16	1008262726	消化科	欧希龙	2019.02.27	44.6	510	306	14.2	3.42	4.27	30.8	2.42	4.61	2.2	26.8	1.14925	12.7273	7.12929
2019.02.27	朱泽山	男	64	0101167446	501消化1	41	1008265512	消化科	欧希龙	2019.02.27	20.6	471	274	7.84	1.26	5.55	31.1	0.953	1.82	1.38	11.3	2.75221	32.6338	14.0437
2019.02.27	王保珍	女	80	0000437408	501消化1	42	1008265522	消化科	欧希龙	2019.02.27	25.5	312	293	13.4	2.48	2.27	45.1	1.75	3.41	1.92	17.4	2.59195	25.7714	9.52447

## Sheet: 3月
样本信息											检测结果
接收日期	样本姓名	性别	年龄	住院号	病区	床位号	条形码编号	科室	送检医生	检测日期	十六碳一烯酸（C16：1）	十八碳一烯酸（C18：1）	十八碳二烯酸（C18：2）	α-十八碳三烯酸（α-C18：3）	γ-十八碳三烯酸（γ-C18：3）	二十碳一烯酸（C20：1）	二十碳四烯酸（C20：4）	二十碳五烯酸（C20：5）	ω-3-二十二碳五烯酸（ω-3-C22：5）	ω-6-二十二碳五烯酸（ω-6-C22：5）	二十二碳六烯酸（C22：6）	AA/DHA	AA/EPA	ω-6/ω-3
2019.03.20	许扬	男	60	0101210320	502消化2	46	1008400417	消化科	陈洪	2019.03.20	11.2	330	269	15.3	1.47	2.18	27.1	2.19	3.49	1.39	24.8	1.09274	12.3744	6.53036
2019.03.21	宋汉元	男	72	0101291406	501消化1	28	1008403380	消化科	俞婷	2019.03.22	12.2	234	162	10.6	0.888	4.68	27.2	0.782	1.99	1.28	11.5	2.36522	34.7826	7.69411
2019.03.21	龚倪	男	65	0101291348	502消化2	43	1008400407	消化科	陈洪	2019.03.22	16.6	292	264	15.8	1.66	3.1	37.9	2.99	3.23	1.89	19.1	1.98429	12.6756	7.42826
2019.03.21	盛艳	女	46	0000382848	502消化2	22	1008400397	消化科	陈洪	2019.03.22	17.8	394	363	24.8	3.64	3.73	38.3	0.725	3.71	2.11	16.2	2.3642	52.8276	8.95895
2019.03.21	苗师学	男	64	0101024674	502消化2	17	1008400385	消化科	陈洪	2019.03.22	19.2	355	234	9	1.13	4.11	16	0.299	1.59	1.13	10.8	1.48148	53.5117	11.6308
2019.03.21	樊俊英	女	70	0101291867	502消化2	33	1008400404	消化科	陈洪	2019.03.22	26.2	488	281	11.9	1.61	3.55	37.8	2.17	3.15	1.6	24.2	1.56198	17.4194	7.77426
2019.03.21	陈桂华	女	55	0101208940	502消化2	6	1008400335	消化科	陈洪	2019.03.22	31.1	515	288	27.3	3.01	4.79	39.5	3.33	5.67	1.23	16.4	2.40854	11.8619	6.29488
2019.03.22	万胜全	女	50	0000432547	501消化1	46	1008413617	消化科	陈延方	2019.03.22	16.1	437	288	12.3	1.53	4.33	22	0.824	2.03	1.63	14.1	1.56028	26.699	10.7049
2019.03.22	陈国彬	男	63	0000430984	501消化1	43	1008417278	消化科	俞谦	2019.03.25	30.4	444	313	19.9	2.71	4.46	35.4	1.15	2.97	2.46	19.6	1.80612	30.7826	8.10569
2019.03.25	龙夕林	女	91	0101292325	501消化1	16	1008420750	消化科	俞谦	2019.03.25	6.02	94.5	114	4.67	1.24	0.874	36.9	2.56	2.57	1.96	17.2	2.14535	14.4141	5.70741
2019.03.26	杨士雅	女	78	0101219679	502消化2	30	1008433286	消化科	刘婧	2019.03.27	31.8	559	344	17.1	3.81	5.08	52.7	3.94	7.19	2.58	35.2	1.49716	13.3756	6.35488
2019.03.27	温传玉	男	70	0101279284	502消化2	1	1008438719	消化科	刘娟	2019.03.27	2.87	194	102	8.95	0.294	2.71	45.5	2.45	3.43	1.1	17.6	2.58523	18.5714	4.59124
2019.03.28	任燕	女	28	0101293248	502消化2	46	1008448268	消化科	刘娟	2019.03.29	27.6	392	268	17	1.91	4.19	27.1	8.95	3.25	1.27	18.2	1.48901	3.02793	6.29283
2019.03.28	咸玉兰	女	66	0101276857	502消化2	7	1008448263	消化科	刘娟	2019.03.29	27.5	461	284	9.36	1.63	4.87	19.9	0.967	2.96	1.05	10.7	1.85981	20.5791	12.7811

## Sheet: included
Patient number	Gender	Age	Patient ID	C16：1	C18：1	C18：2	α-C18：3	γ-C18：3	C20：1	C20：4	C20：5	ω-3-C22：5	ω-6-C22：5	C22：6	ω-6/ω-3	Group	Pathological type
1	M	43	0101293684	10.5	139	128	7.15	1.08	1.21	34.5	1.84	3.05	1.87	16.9	5.717	Single polyp	Hyperplastic polyp
2	F	41	0101294103	5.59	124	151	7.27	1.53	1.02	24.8	1.84	2.22	1.02	17.6	6.16488	Multiple polyps	Fundic gland polyp
3	F	53	0101294369	26.1	313	325	11.4	5.09	1.34	61	2.88	3.29	1.69	19.3	10.6531	Single polyp	Hyperplastic polyp
4	M	47	0101205222	33.9	560	395	17.4	4.53	4.15	58.2	3.93	4.89	2.58	21.6	9.62589	Single polyp	Hyperplastic polyp
5	F	58	0101189630	21.9	404	289	16.4	1.8	2.43	36	4.67	5.48	2.12	30.1	5.80618	Multiple polyps	Hyperplastic polyp
6	F	55	0101294962	13	255	143	13.6	1.66	1.9	41.7	2.89	4.22	1.74	20.5	4.56443	Single polyp	Hyperplastic polyp
7	M	59	0101295129	7.97	199	169	6.7	0.877	1.17	56.2	1.84	2.48	2.33	12.9	9.54879	Single polyp	Hyperplastic polyp
8	F	45	0101295617	14.3	258	222	12.2	1.16	3.63	23.4	1.05	2.96	2.23	16	7.724	Single polyp	Hyperplastic polyp
9	F	45	0101295706	9.76	179	181	9.37	2.01	2.06	34.2	2.13	3.48	1.97	16.4	6.9847	Single polyp	Hyperplastic polyp
10	F	45	0000386462	7.51	92.3	117	4.67	2.08	1.24	35.8	2.96	2.99	1.79	18.4	5.39869	Multiple polyps	Hyperplastic polyp
11	M	76	0101295846	20.3	347	305	19.3	3.44	4.21	30	3.86	3.9	1.73	22.2	6.9056	Single polyp	Hyperplastic polyp
12	F	79	0101015772	42.8	528	432	24.6	4.21	4.27	55	4.83	5.44	3.08	39.7	6.62854	Single polyp	Hyperplastic polyp
13	M	62	0101254109	11.4	190	186	7.91	1.45	1.89	54.5	2.17	2.93	2.04	19.8	7.43645	Single polyp	Hyperplastic polyp
14	F	41	0101154974	31.8	336	267	12.8	1.53	1.91	35.2	3.76	2.52	1.5	18.6	8.10058	Single polyp	Hyperplastic polyp
15	M	66	0101297111	17.7	301	297	17	3.32	1.81	40.3	3.92	3.5	1.16	17.3	8.19223	Multiple polyps	Hyperplastic polyp
16	M	70	0101297022	13	322	223	16	1.79	2.41	29.8	2.23	2.99	0.91	12.9	7.48828	Multiple polyps	Hyperplastic polyp
17	M	55	0101297288	19.6	178	215	14.8	2.62	1.27	53	1.82	3.74	1.79	11.9	8.4442	Single polyp	Hyperplastic polyp
18	F	56	0101297180	26.9	350	301	14	2.77	2.21	59.8	2.85	3.6	2.5	27.2	7.68248	Multiple polyps	Hyperplastic polyp
19	M	46	0101188291	20	255	329	8.92	3.76	3.99	68.1	7.46	6.02	2.85	28.1	7.99426	Single polyp	Hyperplastic polyp
20	M	61	0101297859	20.7	324	376	16	2.18	3.66	48.8	1.67	3.97	2.95	26.5	8.93083	Single polyp	Hyperplastic polyp
21	F	62	0101297877	16.1	198	196	13.1	1.84	3.17	32.1	1.92	2.36	2.35	20.1	6.19771	Multiple polyps	Hyperplastic polyp
22	F	60	0101079445	12.6	213	237	9.68	2.24	3.19	67.5	3.4	4.67	3.54	30.9	6.3778	Multiple polyps	Hyperplastic polyp
23	F	73	0101297942	15.9	201	169	11.6	3.39	2.27	65.5	13.5	7.94	5.83	26	4.12805	Multiple polyps	Hyperplastic polyp
24	F	60	0101298257	32.2	397	480	20.4	7.29	3.67	57.7	4.54	7.46	5.84	31.1	8.67449	Multiple polyps	Hyperplastic polyp
25	M	66	0101125074	7.11	69.3	132	5.1	0.991	2.45	47.5	3.39	5.26	3.81	24.5	4.81833	Single polyp	Hyperplastic polyp
26	F	76	0101266154	24.3	321	385	14.8	2.26	4.22	51.2	4.57	5.03	3.68	36.3	7.28402	Multiple polyps	Hyperplastic polyp
27	M	41	0101298202	32.5	366	303	25	3.34	2.99	39.6	2.57	3.76	2.38	16.6	7.26726	Single polyp	Hyperplastic polyp
28	M	65	0101299115	3.16	72.8	82.2	7.15	0.599	1.24	31.4	2.38	1.98	0.95	8.65	5.71176	Multiple polyps	Hyperplastic polyp
29	M	44	0101297774	12.9	198	145	6.26	2.7	1.62	43.6	1.76	2.88	2.68	10.9	8.89817	Multiple polyps	Fundic gland polyp
30	F	55	0101299111	10.5	183	210	5.74	1.25	1.46	19.9	2.83	2.15	0.645	16.8	8.42278	Single polyp	Hyperplastic polyp
31	M	59	0101299030	12.3	154	170	9.29	0.958	1.25	38.6	2.32	3.17	1.69	21.8	5.77496	Multiple polyps	Fundic gland polyp
32	F	49	0101299218	19.7	342	313	17.1	3.6	1.94	59.6	5.56	4.42	2.82	33.7	6.23593	Multiple polyps	Hyperplastic polyp
33	F	51	0101249020	24.4	278	192	16.7	1.4	4.26	41.5	21.3	5.47	1.48	47.7	2.59274	Single polyp	Hyperplastic polyp
34	F	47	0101300017	15.7	227	158	14.9	2.26	2.38	40.1	2.37	3.42	1.41	19.4	5.03293	Multiple polyps	Hyperplastic polyp
35	F	43	0101298861	33.2	463	364	22	3.37	4.33	39.6	1.2	3.45	2.17	13.5	10.1903	Multiple polyps	Hyperplastic polyp
36	F	71	0101200772	28.8	380	322	17.5	2.39	2.32	41.1	1.61	3.05	2.09	14.5	10.0267	Multiple polyps	Hyperplastic polyp
37	F	63	0101300244	12.2	239	219	11	1.26	2.37	68.7	2.14	5.39	4.17	21.2	7.37805	Multiple polyps	Hyperplastic polyp
38	M	48	0101300619	28.3	484	294	23.4	3.43	5.23	39.3	3.06	3.77	1.79	12.7	7.88539	Multiple polyps	Hyperplastic polyp
39	F	68	0101300802	21	250	259	15.7	2.54	2.15	55.7	3.89	3.96	3.3	16.7	7.96373	Multiple polyps	Hyperplastic polyp
40	F	49	0101301527	25.7	291	383	9.57	6.35	2.54	116	6.41	6.37	6.09	46.3	7.44996	Single polyp	Hyperplastic polyp
41	M	68	0101300857	15.2	333	447	8.08	1.96	3.17	184	10.3	7.73	6.42	62.5	7.21566	Single polyp	Fundic gland polyp
42	F	71	0101301650	21.3	371	243	16	2.24	7.39	38.7	5.75	5.46	1.8	36.4	4.49206	Multiple polyps	Hyperplastic polyp
43	F	60	0101301936	23.4	513	430	18.9	3.78	3.89	61.3	2.89	4.28	3.75	31.5	8.66476	Multiple polyps	Hyperplastic polyp
44	F	47	0101302833	7.04	157	148	7.36	0.828	1.8	71.5	2.59	2.87	2.48	26.1	5.72477	Single polyp	Hyperplastic polyp
45	M	66	0101044739	9.92	355	321	13.4	1.41	5.59	64.5	2.49	3.97	2.53	22.6	9.17193	Multiple polyps	Hyperplastic polyp
46	F	40	0101303130	6.31	175	139	7.26	0.765	2.67	46.4	2.15	2.59	2.01	19.1	6.05064	Multiple polyps	Fundic gland polyp
47	F	61	0101128787	3.84	78	135	3.16	1.02	1.26	65.6	2.86	5.18	2.94	30.8	4.87048	Single polyp	Hyperplastic polyp
48	F	60	0101303185	29.5	339	328	23.8	5.88	1.98	69.2	7.68	5.74	3.34	35.9	5.55826	Multiple polyps	Hyperplastic polyp
49	F	54	0101303833	8.58	137	163	6.41	1.69	0.761	46.8	4.46	3.24	1.18	32.6	4.55299	Multiple polyps	Hyperplastic polyp
50	M	59	0101303798	4.87	113	136	5.38	1.17	0.775	34.1	1.86	2.03	1.13	18.8	6.14179	Single polyp	Hyperplastic polyp
51	M	67	0101304078	12.6	326	180	18.8	1.1	8.57	34.9	1.73	2.41	1.67	20.1	5.05739	Single polyp	Hyperplastic polyp
52	M	47	0101302505	9.35	188	216	8.57	2.3	1.56	61.4	2.05	2.89	1.97	27.3	6.90198	Single polyp	Hyperplastic polyp
53	M	56	0101303759	7.63	131	180	7.17	0.997	1.18	34.1	1.66	2.06	1.49	21.3	6.72839	Single polyp	Hyperplastic polyp
54	F	59	101298988	37	343	269	18.3	3.28	2.41	54.4	7.35	4.98	2.16	20.6	6.42	Single polyp	Hyperplastic polyp
55	M	52	101086765	12.9	225	203	11.9	3.05	2.24	67.6	6.57	5.17	3.28	31.3	5.04	Single polyp	Hyperplastic polyp
56	M	39	101306439	9.8	254	229	14.9	1.99	2.28	48.1	2.7	2.88	2.59	16.1	7.7	Single polyp	Fundic gland polyp
57	F	30	101137029	35.2	351	273	14.5	3.92	3.23	46.2	2.42	3.16	2.85	16.3	8.96	Single polyp	Fundic gland polyp
58	F	60	101249060	10.8	114	114	7.26	1.25	2.49	64.3	7.14	2.85	1.4	16.1	5.43	Multiple polyps	Fundic gland polyp
59	F	61	101155066	25.8	255	208	11.9	2.36	2.04	47.2	5.51	5.38	3.53	22	5.83	Multiple polyps	Hyperplastic polyp
60	F	58	101308644	21.2	365	329	14.3	1.99	2.59	145	5.13	3.09	2.64	31.6	10.01	Multiple polyps	Hyperplastic polyp
61	F	57	101309059	42.3	457	717	15	2.6	3.57	212	12.6	7.31	7.86	60.8	9.82	Multiple polyps	Hyperplastic polyp
62	F	63	435293	16.5	376	308	17.3	2.52	4.8	89.2	4.87	4.51	4.38	36.8	6.37	Multiple polyps	Hyperplastic polyp
63	F	53	371976	14.6	272	393	9.62	1.97	2.09	106	2.2	4.61	4.11	29	11.12	Multiple polyps	Fundic gland polyp
64	F	35	101201419	33.3	330	540	15.2	3.2	3.28	200	7.82	13.4	7.18	55.7	8.15	Multiple polyps	Hyperplastic polyp
65	M	51	101317566	16.6	335	318	19.6	4.72	2.67	53.1	4.12	5.9	2.23	24.8	6.95	Single polyp	Hyperplastic polyp
66	F	55	101320407	5.47	163	365	13.6	0.763	1.94	71.7	11.6	5.24	2.51	45.3	5.81	Multiple polyps	Hyperplastic polyp
67	M	66	101170580	29.3	368	277	12.5	4.3	3.08	25.2	4.85	3.98	2.27	20.3	7.42	Single polyp	Hyperplastic polyp
68	M	76	101323172	3.68	76.2	109	5.08	1.2	1.06	39.2	1.97	2.19	1.34	16.3	5.9	Multiple polyps	Hyperplastic polyp
69	M	51	101015770	21.6	486	430	30	6.55	9.06	83	8.09	10.2	5.2	32.7	6.48	Multiple polyps	Hyperplastic polyp
70	F	51	101309741	17.9	330	437	15.9	3.85	3.83	139	11.7	10.8	9.06	73	5.29	Single polyp	Hyperplastic polyp
71	M	58	101310209	20.7	293	407	16.8	2.36	2.57	137	8.17	8.55	5.51	51.8	6.47	Single polyp	Hyperplastic polyp
72	F	36	369014	12	196	360	8.45	1.42	2.33	121	4.66	5.63	2.84	37.2	8.67	Multiple polyps	Hyperplastic polyp
73	M	64	101243045	18.91	218	464	26.4	3.55	3.18	102	3.59	6.44	4.85	30.2	8.62	Single polyp	Hyperplastic polyp
74	F	43	101311662	5.29	119	109	4.43	0.898	0.892	29	1.31	1.48	1.01	8.38	8.97	Single polyp	Hyperplastic polyp
75	F	41	101313028	2.36	59.9	114	4.3	0.647	1.52	50.5	1.77	2.16	3.17	24.5	5.14	Multiple polyps	Fundic gland polyp
76	M	70	101297022	10.9	250	193	14.7	2	3.74	59.7	6.16	5.41	2.15	22.7	5.25	Single polyp	Fundic gland polyp
77	M	55	101223899	2.92	107	98.9	4.61	0.234	2.39	16.8	1.57	1.27	0.458	11.5	6.14	Single polyp	Hyperplastic polyp
78	F	58	101007462	4.43	113	103	9.09	1.87	2.65	35.2	3.72	2.73	0.745	16.4	4.41	Single polyp	Hyperplastic polyp
79	M	71	101136923	15.4	311	270	11.6	2.13	2.34	23.1	1.78	2.28	1.32	12.6	10.49	Single polyp	Hyperplastic polyp
80	M	53	101191522	3.87	79.9	72.4	3.88	1.2	0.73	17.3	3.79	1.66	0.547	9.48	4.86	Multiple polyps	Hyperplastic polyp
81	M	47	101037209	11.9	471	304	23.4	2.92	5.83	37.4	2.08	2.74	1.26	11.5	8.7	Single polyp	Hyperplastic polyp
82	F	36	101319879	9.57	132	133	6.01	1.19	1.18	41.8	4.39	2.91	2.04	21.9	5.06	Single polyp	Hyperplastic polyp
83	M	36	101277688	29.5	315	299	11.9	2.7	2.67	63.7	2.07	5.22	2.58	22.4	8.85	Single polyp	Hyperplastic polyp
84	F	44	101322832	5.73	187	242	6.18	1.14	1.45	27.7	0.965	1.89	1.46	14.9	11.38	Multiple polyps	Hyperplastic polyp
85	F	68	101322335	18	246	197	11.1	1.33	2.82	23.8	9.25	2.53	1.14	13.3	6.17	Single polyp	Hyperplastic polyp
86	M	63	101097776	3.4	80.5	112	2.85	0.743	0.837	38.7	6.5	3.4	2.01	32.8	3.37	Multiple polyps	Fundic gland polyp
87	F	61	101307348	5.56	192	197	7.41	3.02	1.47	33.6	0.978	1.84	0.776	6.76	13.8	Single polyp	Hyperplastic polyp
88	F	53	459791	25.2	272	293	11.2	1.65	2.29	33.5	1.29	2.23	2.08	15.1	11.07	Single polyp	Hyperplastic polyp
89	M	48	101272058	17	323	519	39.9	2.72	3.26	133	26	11.8	7.5	63.3	4.7	Multiple polyps	Hyperplastic polyp
90	F	64	101214536	47	417	650	17	1.76	3.01	174	4.7	6.16	5.86	52.9	10.3	Single polyp	Hyperplastic polyp
91	M	36	101310367	16.7	272	312	14.7	2.87	2.54	108	2.99	5.21	2.99	36	7.23	Single polyp	Fundic gland polyp
92	F	51	101310422	34	395	677	31	2.47	4.55	220	18.4	9.37	3.34	50.8	8.24	Multiple polyps	Hyperplastic polyp
93	M	45岁	0000333859	6.14	114	96.5	3.29	0.612	0.752	5.22	0.293	0.42	0.804	2.95	14.76	Single polyp	Hyperplastic polyp
94	F	68岁	0000343969	23.4	189	124	6.13	1.37	0.742	4.99	0.899	0.622	0.48	3.42	11.8	Multiple polyps	Fundic gland polyp
95	M	54岁	0000370446	10	115	102	6.08	1.05	0.29	5.1	0.82	0.633	0.247	3.43	9.88	Single polyp	Hyperplastic polyp
96	M	58岁	0000402138	4.09	58.1	100	4.83	0.776	0.514	3.2	0.446	0.226	0.393	1.32	15.26	Single polyp	Hyperplastic polyp
97	M	57岁	0000404479	4.63	61.2	51.9	1.63	0.389	0.382	6.37	0.256	0.22	0.693	1.89	14.72	Single polyp	Fundic gland polyp
98	F	67岁	0000419855	7.97	123	87	7.01	2.54	0.392	6.34	0.724	0.805	0.253	2.22	8.93	Single polyp	Hyperplastic polyp
99	F	61岁	0000448147	5.7	103	77.4	3.01	1.05	0.601	6.42	0.404	0.581	0.139	2.65	12.81	Single polyp	Hyperplastic polyp
100	M	64岁	0000449384	3.54	45	27.5	1.27	0.239	0.371	8.26	1.23	0.289	0.232	2.14	7.35	Multiple polyps	Hyperplastic polyp
101	M	77岁	0000450792	8.1	150	157	6.08	1.3	0.796	3.49	0.616	0.498	0.276	3.08	15.76	Single polyp	Hyperplastic polyp
102	F	69岁	0000453312	2.18	49.7	29.4	1.13	0.28	0.565	7.38	0.238	0.241	0.227	1.36	12.57	Multiple polyps	Hyperplastic polyp
103	M	68岁	0101013443	39.1	428	347	11.4	3.68	2.29	11.3	1.38	2.28	0.291	8.4	15.45	Multiple polyps	Hyperplastic polyp
104	M	50岁	0101028889	22.7	295	208	9.51	2.27	1.72	7.28	2.54	3.07	0.367	11	8.34	Multiple polyps	Hyperplastic polyp
105	F	75岁	0101043599	14.8	288	208	5.28	1.59	1.35	7.78	0.351	0.785	0.275	4.46	20.04	Multiple polyps	Fundic gland polyp
106	M	74岁	0101056046	2.32	70.2	82.5	7.27	0.848	0.4	2.48	0.45	0.412	0.176	2.19	8.32	Multiple polyps	Hyperplastic polyp
107	M	45岁	0101065938	14.2	178	159	8.39	4.31	0.352	7.49	1.61	1.01	0.17	5.86	10.14	Single polyp	Hyperplastic polyp
108	F	60岁	0101068511	4.62	124	86.8	5.35	1.18	0.604	6.31	1.07	0.408	0.495	3.06	9.57	Single polyp	Fundic gland polyp
109	F	47岁	0101070037	24.9	340	321	13.7	3.35	1.68	17.3	1.12	1.4	0.587	6.14	15.31	Multiple polyps	Fundic gland polyp
110	F	78岁	0101073720	9.77	116	123	8.04	1.48	0.312	4.45	0.432	0.368	0.055	3.37	10.58	Multiple polyps	Fundic gland polyp
111	M	67岁	0101121756	18	277	181	9.56	1.93	3.89	5.21	0.713	1	0.167	3.6	12.67	Multiple polyps	Hyperplastic polyp
112	F	69岁	0101155989	21.9	182	146	5	1.72	2.19	7.2	0.538	0.651	0.699	1.78	19.47	Multiple polyps	Hyperplastic polyp
113	F	65岁	0101157084	18.7	164	166	12.1	2.83	0.603	6.39	0.845	0.628	0.776	3.89	10.05	Multiple polyps	Hyperplastic polyp
114	F	59岁	0101176513	16	260	190	8.6	1.7	1.8	5.5	0.2	0.51	0.0661	2.2	17.16	Multiple polyps	Hyperplastic polyp
115	F	69岁	0101180663	28.9	339	313	11.9	4.36	2.13	12	1.11	2.13	0.214	8.86	13.75	Multiple polyps	Hyperplastic polyp
116	F	42岁	0101207354	0.915	18.5	12.3	0.621	0.337	0.319	3.15	0.18	0.16	0.187	1.2	7.38	Multiple polyps	Hyperplastic polyp
117	F	63岁	0101220430	4.22	93.6	93.6	3.45	0.536	0.475	3.42	0.147	0.279	0.52	2.6	15.09	Multiple polyps	Hyperplastic polyp
118	M	65岁	0101227565	2.59	37.5	26.3	1.86	0.47	0.28	3.96	0.516	0.277	0.16	1.64	7.19	Multiple polyps	Fundic gland polyp
119	F	43岁	0101239458	3.29	71.6	62.4	3.92	0.623	0.486	6.1	1.07	0.456	0.171	2.91	8.29	Single polyp	Fundic gland polyp
120	F	57岁	0101253169	26.6	404	285	12.2	3.23	2.17	8.74	0.84	1.35	0.195	5.18	15.2	Single polyp	Hyperplastic polyp
121	M	59岁	0101255068	61.9	538	567	25.8	5.01	1.56	10.4	1.5	1.54	0.232	7.02	16.25	Single polyp	Hyperplastic polyp
122	F	64岁	0101263387	7.51	110	91.2	5.2	1.1	0.639	5.37	0.474	0.529	0.235	2.31	11.5	Multiple polyps	Hyperplastic polyp
123	M	69岁	0101279200	28.3	239	160	6.23	1.35	3.48	6.23	0.385	0.783	0.23	4.93	13.63	Single polyp	Hyperplastic polyp
124	M	65岁	0101282326	6.55	131	70.3	5.89	0.389	1.07	6.32	0.799	0.535	0.269	2.64	7.82	Multiple polyps	Hyperplastic polyp
125	F	66岁	0101285963	4.2	84.2	59.5	6.2	0.865	0.648	4.9	0.958	0.585	0.267	3.21	5.98	Single polyp	Hyperplastic polyp
126	F	69岁	0101289038	26.6	215	215	0.82	1.58	0.904	3.46	0.458	0.788	0.316	4.2	19.62	Multiple polyps	Fundic gland polyp
127	F	72岁	0101304162	34.1	280	191	6.2	1.52	2.09	9.07	0.504	0.768	0.247	3.43	18.53	Single polyp	Hyperplastic polyp
128	M	50岁	0101305263	8.03	179	122	6.72	1.6	1.2	7.04	0.494	0.553	0.512	2.52	12.72	Single polyp	Hyperplastic polyp
129	M	42岁	0101306439	10.5	212	211	11.6	1.91	0.919	6.55	0.828	1.11	0.255	4.99	11.87	Single polyp	Hyperplastic polyp
130	F	51岁	0101307006	4.81	78.9	65	4.28	0.748	0.582	5.86	0.186	0.319	0.486	1.49	11.45	Single polyp	Hyperplastic polyp
131	M	58岁	0101314965	9.66	153	110	3.81	1.11	0.693	5.32	0.67	0.564	0.262	3.38	13.84	Multiple polyps	Hyperplastic polyp
132	F	62岁	0101317329	23	180	130	5.7	1.9	1	12	0.79	0.79	0.211	4.6	12.15	Multiple polyps	Hyperplastic polyp
133	M	63岁	0101322914	17	282	175	13	1.03	1.06	10.4	0.59	0.67	0.597	2.37	11.25	Single polyp	Hyperplastic polyp
134	M	64岁	0101328796	5.1	115	89.1	5.83	1.25	0.848	8.51	0.67	0.657	0.451	2.32	10.46	Single polyp	Fundic gland polyp
135	M	64岁	0101328977	2.55	65.4	70	1.84	0.733	0.445	5.76	0.128	0.299	0.206	1.56	20.05	Multiple polyps	Hyperplastic polyp
136	F	84岁	0101340412	38.3	433	247	10.2	1.92	2.72	9.41	9.69	4.1	0.44	21.4	5.71	Multiple polyps	Hyperplastic polyp
137	F	75岁	0101348163	13.6	199	206	5.11	1.23	0.811	4.76	0.429	0.744	0.585	3.24	22.28	Single polyp	Hyperplastic polyp
138	M	64岁	0101365990	2.71	52.2	41.4	2.03	0.475	0.623	7.62	0.494	0.439	0.256	1.69	10.69	Single polyp	Hyperplastic polyp
139	F	64岁	0101374967	0.779	16.2	10.4	0.539	0.18	0.219	4.52	0.285	0.126	0.191	0.806	8.66	Multiple polyps	Hyperplastic polyp
140	F	73岁	0101382703	21.3	214	166	5.56	1.71	0.498	7.72	0.875	0.66	0.271	4.62	15	Single polyp	Hyperplastic polyp
141	M	67岁	0101389911	3.03	84.7	114	6.71	0.897	0.677	7.17	0.559	0.536	0.251	2.05	12.42	Single polyp	Hyperplastic polyp
142	M	61岁	0101416488	15.4	329	394	8.64	9.21	1.27	5.04	0.745	0.662	0.897	5.62	29.74	Single polyp	Hyperplastic polyp
143	M	70岁	0101420769	16.8	193	169	6.74	1.64	1.02	10.2	0.463	0.465	0.327	3.7	16.38	Multiple polyps	Hyperplastic polyp
144	F	42岁	0101422862	16	160	120	5.7	1.3	0.74	9.8	0.43	0.58	0.365	3.6	13.81	Single polyp	Hyperplastic polyp
145	F	42岁	0101423167	18	200	190	11	2.2	1	7.8	0.68	0.8	0.146	4.59	12.53	Single polyp	Hyperplastic polyp
146	F	45岁	0101423247	3.9	70	62.1	5.04	1.29	0.4	8.04	0.641	0.317	0.217	3.3	9.04	Single polyp	Hyperplastic polyp
147	F	68岁	0101424581	28.4	345	289	14.1	4.46	2.06	22.2	1.72	2.08	0.18	8.3	12.43	Multiple polyps	Hyperplastic polyp
148	M	58岁	0101425391	14	160	100	5	1.1	1.1	8.9	2.8	0.7	0.17	2.77	8.29	Multiple polyps	Hyperplastic polyp
149	F	71岁	0101425421	19.4	218	155	7.22	1.34	1.27	7.68	1.11	0.784	0.31	3.05	12.07	Multiple polyps	Hyperplastic polyp
150	M	58岁	0101425446	14.8	177	164	6.37	1.26	0.873	11	0.456	0.614	0.167	3.98	17.5	Single polyp	Fundic gland polyp
151	M	57岁	0101425562	8.55	163	116	10.4	1.03	0.812	5.7	0.298	0.334	0.227	3.73	10.07	Single polyp	Hyperplastic polyp
152	F	70岁	0101425586	8.11	152	104	5.55	1.03	0.742	7.47	0.508	0.425	0.368	1.48	12.92	Single polyp	Hyperplastic polyp
153	F	68岁	0101425589	16.2	223	102	8.21	1.51	1.19	7.82	1.35	1.17	0.785	1.73	7.25	Single polyp	Hyperplastic polyp
154	F	76岁	0101425948	16	250	200	9.1	2.2	1.6	9.9	0.75	0.84	0.269	7.17	13.9	Single polyp	Hyperplastic polyp
155	M	49岁	0101426320	27	200	120	11	2.8	1.2	13	2	1.4	0.191	1.9	7.4	Multiple polyps	Fundic gland polyp
156	M	60岁	0101426353	3.7	78	53	2.6	0.34	0.74	7	0.35	0.26	0.339	5.17	12.32	Multiple polyps	Hyperplastic polyp
157	F	51岁	0101426361	15	230	190	7.9	2.3	1.4	17	0.59	0.78	0.263	4.1	16.94	Single polyp	Fundic gland polyp
158	M	42岁	0101426585	17	285	212	8.64	2.23	2.32	16	0.668	1.49	0.393	3.91	14.27	Multiple polyps	Fundic gland polyp
159	M	32岁	0101426714	26.7	389	261	13.8	1.19	3	8.33	0.646	0.939	0.295	2.58	14.87	Single polyp	Hyperplastic polyp
160	F	58岁	0101426765	11.1	113	74.6	30.4	1.19	0.54	9.14	0.78	0.56	0.141	4.07	11.69	Single polyp	Hyperplastic polyp
161	F	37岁	0101426860	11	170	116	4.41	0.91	0.79	7.01	0.35	0.52	0.253	4.54	15.51	Single polyp	Hyperplastic polyp
162	F	43	0101293548	10.8	214	206	14.6	1.97	2.2	44.6	3.39	3.59	3.06	23.7	5.64554	Control group
163	M	50	0000334617	28.1	282	249	17.1	2.74	2.47	56.1	6.16	5.22	1.6	32.3	5.09115	Control group
164	M	26	0101294224	2.93	51.5	61	0.772	0.155	0.298	25	1.47	1.18	0.792	11.9	5.67465	Control group
165	M	54	0101294277	2.46	89.8	86.3	3.71	0.436	1.62	30.6	2.45	1.69	1.25	14.7	5.2588	Control group
166	M	65	0101294265	15.5	241	173	14.1	2.46	2.24	46.8	3.15	3.26	2.09	25	4.92969	Control group
167	F	50	0101293518	3.19	66	108	3.85	0.387	0.505	46.2	2.02	2.53	1.5	19.8	5.535	Control group
168	F	55	0101294585	39.7	529	381	22.9	3.99	3.5	64.5	5.93	6.65	2.19	30.6	6.83535	Control group
169	M	44	0101295051	6.71	151	172	7.18	1.2	1.14	37.3	2.63	2.87	2.39	21.3	6.26516	Control group
170	M	55	0101264807	6.87	231	232	17.2	2.25	1.88	52.4	3.97	4.13	1.76	21.5	6.16261	Control group
171	M	63	0101233846	20.8	378	342	10.9	3.78	3.57	31.8	2.14	3.8	1.22	13.5	12.4852	Control group
172	F	42	0101295455	23.2	364	318	20.9	6	6.47	40.7	3.42	6.54	2.34	20.8	7.10492	Control group
173	F	63	0101295368	14.7	159	200	5.99	1.58	2.63	39	2.53	2.97	1.99	14.8	9.2267	Control group
174	F	59	0101031650	11.8	135	163	10.6	4.11	1.6	38.3	3.56	3.3	2.3	16.9	6.04511	Control group
175	F	64	0101295485	10.8	212	137	7.12	0.968	4.5	37	1.83	3.36	3.36	20.2	5.48533	Control group
176	M	60	0101295614	17.2	257	368	36.2	6.98	2.29	35.8	3.13	4.61	1.27	15	6.99101	Control group
177	F	47	0101295710	20.3	270	260	16.1	2.49	3.24	41.7	3.43	4.95	2.11	25.3	6.15307	Control group
178	M	39	0101054318	9.96	231	232	21.2	3.84	3.56	19.5	2.5	2.31	0.778	9.98	7.11637	Control group
179	F	55	0101295893	7.32	103	121	7.53	2.96	1.43	33.1	2.03	2.11	1.66	12.9	6.45991	Control group
180	F	47	0101295972	19.2	378	272	12.9	1.9	4.79	30.4	2.06	3.75	2.02	23.6	7.2399	Control group
181	F	62	0101296218	22.9	338	247	9.55	2.36	3.05	44.4	3.11	3.52	1.7	28.1	6.67254	Control group
182	F	55	0101050451	15.6	327	262	11.2	1.37	3.62	27.3	0.466	2.19	1.84	11.7	11.4458	Control group
183	F	70	0101296128	31.8	364	254	12.2	1.43	2.19	44.6	1.5	3.25	2.37	22.2	7.72414	Control group
184	M	56	0101296103	11.4	172	182	12.9	2.09	1.76	37.4	1.11	1.49	1.7	11	8.42226	Control group
185	M	65	0101277432	24	677	385	12.9	1.63	8.09	35.6	0.983	2.75	2.13	11.4	15.1379	Control group
186	M	60	0101296978	8.36	86.5	97.8	4.59	2.01	0.765	35.4	1.95	1.73	1.57	9.71	7.60734	Control group
187	M	55	0101295538	14.6	296	330	20.7	3.96	1.63	44.2	1.79	2.28	1.7	15.8	9.36308	Control group
188	F	40	0101296751	8.77	256	196	5.26	0.947	2.29	43.3	1.7	2.04	1.21	17.2	9.21592	Control group
189	M	71	0101297136	12.2	122	144	7.73	0.942	0.946	32.4	0.991	1.57	2.11	13.6	7.51128	Control group
190	F	62	0101297283	18.5	363	292	26.9	3.19	4.95	40.1	2.53	3.69	2.06	23.1	6.00053	Control group
191	M	73	0101297295	25.1	290	229	12.5	1.97	1.78	46.6	5.12	3.19	1.61	15.7	7.64667	Control group
192	M	55	0101203114	14.1	351	257	13.3	1.84	2.31	33.1	1.63	2.4	1.3	13.5	9.51151	Control group
193	F	49	0101271054	14.4	243	318	16.9	4.37	2.65	60.4	2.84	5.19	2.84	19.7	8.64015	Control group
194	F	53	0101060357	15.5	208	269	7.63	1.82	2.9	69.8	2.07	5.16	5.55	27.6	8.15285	Control group
195	F	71	0101010892	35.8	516	449	27.9	7.67	8.18	66.3	2.24	5.93	3.01	28	8.20946	Control group
196	F	69	0101297775	16.5	204	163	9.77	2.67	2.52	44.3	4.57	6.46	3.5	16.7	5.69253	Control group
197	M	43	0101154218	13.2	203	250	7.65	1.97	2.44	47.3	2.29	4.42	2.15	26.4	7.395	Control group
198	F	64	0101133104	25.4	296	321	11.5	4.73	3.44	71	4.48	7.13	7.02	32.7	7.23437	Control group
199	F	57	0000405466	6.87	116	237	7.01	1.46	0.887	52.5	7.24	4.48	2.99	30.1	6.01986	Control group
200	F	72	0101296876	25.1	259	269	10.5	3.16	2.2	52.6	7.9	6.56	2.63	38.2	5.1835	Control group
201	M	41	0101298027	16.5	277	177	15.7	2.83	11.4	50.7	7.61	5.04	4.85	28.2	4.16233	Control group
202	M	52	0101120702	36.4	596	471	36.7	3.4	7.53	68.4	9.03	8.68	4.99	30.5	6.45142	Control group
203	M	38	0101298325	22.9	437	458	14.2	3.91	4.66	76.1	3.67	6.97	6.2	30.7	9.79852	Control group
204	M	37	0101298562	17.5	227	238	11.3	2.35	2.28	34.9	2.44	3.21	1.35	14.9	8.68446	Control group
205	F	67	0000414351	7.64	68	95.7	3.95	0.756	0.803	32.4	1.44	2.47	2.38	20.9	4.56314	Control group
206	M	64	0101068872	8.67	141	188	5.34	0.889	1.22	47.2	1.87	2.98	2.43	22.9	7.20819	Control group
207	M	50	0101125712	4.58	87.2	87.5	5.11	0.538	1.01	24.5	1.52	1.81	0.975	9.14	6.45694	Control group
208	M	71	0101299690	7.8	76.9	73.1	2.41	1.33	0.634	20.1	1.42	1.59	1.21	8.58	6.83857	Control group
209	F	46	0101299888	18.1	307	230	14.6	2.02	4.19	33.2	3.14	3.86	1.4	23.4	5.92489	Control group
210	M	26	0101075416	14.5	243	231	15.4	2.34	3.02	40.3	2.01	3.17	1.8	19	6.95907	Control group
211	M	30	0101248312	27.4	333	232	13.4	4.57	1.83	53.5	3.14	4.76	3.09	20.7	6.98	Control group
212	F	61	0101300092	68.1	772	608	64.3	7.78	7.05	71.7	8.2	8.71	2.82	37.6	5.81012	Control group
213	F	61	0000428138	46	627	380	20.7	4.48	4.38	59.7	1.63	3.86	4.24	19.1	9.90108	Control group
214	M	61	0101300371	7.56	158	227	21.6	3.1	1.52	31.6	1.12	1.8	1.11	8.7	7.9112	Control group
215	M	61	0101300383	24.6	336	299	23.6	3	2.74	53.9	2.43	2.51	0.906	13.9	8.4073	Control group
216	F	70	0000381866	10.7	174	127	6.62	0.947	1.25	49.8	5.68	2.99	0.908	16.6	5.60223	Control group
217	M	43	0101300213	35.5	276	289	14.9	2.42	2.13	40.1	1.65	3.96	1.34	20.1	8.1965	Control group
218	M	61	0101169456	38.4	524	365	31.2	3.43	7.2	86	7.15	6.76	2.91	39.1	5.43095	Control group
219	M	57	0101249053	21.9	371	342	21.7	4.53	3.01	103	7.64	6.99	4.27	45.5	5.54564	Control group
220	F	37	0101300483	24.5	416	326	25.4	2.37	2.96	42.4	3.1	4.39	1.53	30.5	5.87317	Control group
221	M	49	0101159241	14.3	218	179	14.8	2.32	2.25	41.1	2.18	2.31	1.13	13.4	6.83848	Control group
222	M	52	0101300426	6.11	92.1	178	3.83	1.02	0.839	28.2	0.587	1.3	1.16	7.61	15.6359	Control group
223	M	59	0000405452	47.8	348	314	10.9	1.93	2.86	53.4	3.89	3.87	2.56	26.8	8.1806	Control group
224	M	64	0101242996	18.2	293	250	17.5	0.998	3.88	39.2	1.53	2.67	2.27	19.9	7.03048	Control group
225	M	48	0101300677	25.9	466	291	20.1	2.09	4.78	39.6	3.56	2.96	1.49	20.1	7.15283	Control group
226	F	65	0101287808	16.8	444	445	17.8	9.52	4.82	159	6.07	6.35	5.57	43.8	8.36382	Control group
227	F	50	0101300700	15.9	357	412	27.6	3.53	3.23	85.7	3.69	6.64	4.06	45.7	6.04197	Control group
228	F	35	0101301374	25.6	399	519	13.1	2.9	4.11	218	13.5	12.7	5.43	82.9	6.09926	Control group
229	F	68	0101149322	28.7	691	472	28.3	9.2	7.01	165	26	14	5.2	62.2	4.99157	Control group
230	M	43	0101153942	40	584	593	24.4	2.37	7.29	126	14.6	7.87	3.05	48.2	7.61986	Control group
231	M	50	0101301531	47.1	591	485	24.9	2.4	4.92	92.3	10.6	10.3	3.55	67.1	5.16608	Control group
232	F	38	0101300931	23.5	461	376	20.6	2.35	7.38	36.2	1.12	4.47	2.73	30.5	7.36073	Control group
233	M	41	0101302273	4.78	126	106	7.88	1.16	1.64	31.3	1.23	2.24	1.27	12.8	5.78592	Control group
234	F	41	0101302517	11.5	188	364	28	3.38	2.73	102	9.78	5.89	3.43	32.9	6.17487	Control group
235	M	47	0101302828	5.71	172	210	11	1.38	2.24	45.8	1.67	2.48	1.86	10.3	10.1784	Control group
236	F	47	101302829	5.76	149	184	4.74	0.405	1.73	61.6	7.84	4.75	3.31	43.7	4.08512	Control group
237	M	41	0101302792	23.7	293	291	16.3	4.28	2.32	90.7	13	7.07	3.76	31.6	5.734	Control group
238	F	37	0101303004	42.5	375	326	18.3	3.41	3.91	67.1	2.8	5.04	5.23	29.1	7.27263	Control group
239	M	69	0000406287	11.3	260	290	8.12	2.94	2.31	58.7	3.59	5.51	2.67	27.4	7.94061	Control group
240	F	57	0101154755	13	340	312	17	2.19	4.92	75.8	3.57	5.48	4.06	35.2	6.43347	Control group
241	M	23	0101302985	12.9	190	193	10.5	3.21	1.97	57.1	6.98	4.57	2.04	22.8	5.69342	Control group
242	F	48	0101303132	6.3	235	276	12.4	2.21	2.13	45.7	0.966	2.61	2.4	17.8	9.661	Control group
243	M	54	0101303337	12	303	286	8.96	2.23	2.27	47	3.2	2.56	1.98	22	9.18328	Control group
244	F	44	0101303460	11.5	206	291	9.1	1.72	1.81	58.4	1.12	2.8	3.83	16.5	12.0241	Control group
245	F	70	0101303560	19.6	599	428	29.4	4.41	5.44	31.4	0.688	2.91	1.97	11.5	10.4674	Control group
246	M	47	0101303612	6.22	122	155	4.73	1.22	1.52	56.2	1.84	2.47	2.01	18.2	7.87188	Control group
247	M	40	0101304062	6.85	155	204	6.23	1.94	1.75	58	2.96	3.12	1.82	21.4	7.88371	Control group
248	M	59	0101183151	8.25	277	260	8.67	1.99	2.39	52.6	1.11	2.7	1.54	31.5	7.18804	Control group
249	F	58	0101110790	38.7	338	299	17	4.64	2.18	53.2	10.6	6.17	2.11	58.7	3.8818	Control group
250	M	46	0101304092	8.52	183	152	6.19	1.54	1.33	39.4	2.31	2.17	1.32	25.7	5.34122	Control group
251	M	64	101094844	14.1	338	312	12	1.46	3.34	54.1	20	7.52	1.87	3.84	4.74	Control group
252	M	56	101307128	11.5	155	186	6.79	3.03	1.47	23.7	1.92	2.19	1.39	7.52	11.62	Control group
253	F	71	101099381	10	94.2	138	5.16	1.68	0.818	46.5	1.08	2.41	1.59	9.71	10.23	Control group
254	M	60	101271172	6.32	98.3	149	5.71	1.15	0.841	15.3	0.865	0.76	0.829	6.4	12.1	Control group
255	F	71	101011986	17	388	438	16.4	2.71	4.79	166	14	9.32	6.18	78.8	5.17	Control group
256	F	81	419554	20.3	243	256	7.94	1.87	2.1	88.7	2.47	2.07	2.8	19.4	10.96	Control group
257	F	67	429172	10	152	209	7.15	1.29	1.32	119	4.9	3.89	1.89	30.4	7.15	Control group
258	F	77	101308899	13.2	222	380	7.33	2.03	1.93	131	6.63	5.55	7.41	35	9.55	Control group
259	M	40	101309090	22.6	250	445	17	4.51	2.44	167	12.1	6.97	3.35	48.1	7.36	Control group
260	F	45	101309564	11.7	284	790	11.5	2.87	2.46	383	15.1	7.5	7.67	50.7	13.96	Control group
261	M	59	101263556	11.4	271	346	15.4	2.13	2.74	48	3.44	4.4	1.7	28.6	7.67	Control group
262	M		101002610	10.8	374	445	14.9	2.73	2.57	43.7	0.968	3.26	2.9	18.9	13	Control group
263	M	43	101305472	26.6	376	312	17.6	3.71	2.97	66.1	6.25	6.48	3.58	35.8	5.83	Control group
264	F	59	101305929	12.2	266	286	15.5	1.9	2.68	50.3	1.71	3.4	2.69	20.1	8.37	Control group
265	F	58	384785	16.8	153	369	7.05	1.89	3.91	136	22.1	9.95	7.02	63.8	4.99	Control group
266	F	53	348811	39.9	510	508	29.7	5.66	4.48	132	6.3	12.7	12.8	57.6	6.19	Control group
267	F	67	393370	43.3	462	303	22.8	5.23	5.16	50.6	7.22	8.11	4.44	36.7	4.85	Control group
268	F	59	101230172	20.4	398	334	18.4	3.55	2.9	74.5	4.16	7.08	3.81	35.2	6.41	Control group
269	F	56	101315862	12.8	252	234	9.28	1.51	3.39	44.5	1.69	2.64	1.82	17.8	8.97	Control group
270	F	48	101099040	10.7	195	231	14.6	1.42	2.26	21.8	1.01	1.97	0.728	11.9	8.65	Control group
271	M	65	101322373	21.3	307	268	10.9	1.55	3.22	24	1.32	2.79	1.97	18.7	8.77	Control group
272	F	57	101323870	22.1	227	168	7.55	1.33	2.39	23.4	1.36	1.43	1.15	13.3	8.2	Control group
273	F	31	101324164	26.9	444	260	14.3	2.73	3.78	22.1	2.01	3.97	1.94	19.6	7.19	Control group
274	M	56	101324216	13.2	137	138	6.97	1.56	1.68	21	2.29	2	1.17	15.4	6.07	Control group
275	M	80	101265389	27.3	300	362	9.76	1.74	2.28	77.6	2.42	3.07	4.1	29.8	9.89	Control group
276	M	49	101320647	15.9	180	192	11.5	2.03	2.42	27.2	1.46	2.94	2.09	14.3	7.39	Control group
277	F	52	101322004	15.2	398	388	17.9	4.06	4.02	33	1.52	5.39	4.29	32.5	7.49	Control group
278	M		101322231	16.4	245	198	9.12	1.39	2.81	26.4	0.781	1.58	1.43	8.53	11.35	Control group
279	M	34	101322503	22.1	215	171	8.84	1.36	2.01	36.1	2.28	3.81	1.59	19.3	6.14	Control group
280	F	50	101301704	3.81	109	138	8.48	1.4	1.21	19.9	1.24	1.49	0.876	13.6	6.46	Control group
281	F	61	101322740	29.2	479	447	51.6	3.58	5.06	25.1	2.22	3.37	1.46	21.7	6.05	Control group
282	F	61	101022031	29.1	349	391	11.3	2.38	2.9	41.4	4.69	2.87	2.71	24.5	10.09	Control group
283	M	58	101301835	20.2	310	287	12.4	1.82	3.33	35.1	1.8	3.03	1.7	16.7	9.6	Control group
284	M	63	431972	7.73	158	140	11.5	3.53	1.71	27	3.74	2.78	1.28	17.1	4.89	Control group
285	F	73	368694	38.6	706	548	27.6	4.32	6.73	66.3	3.81	6.54	2.73	40.1	7.96	Control group
286	M	54	101323782	25.9	354	228	7.98	2.46	3.36	20.8	1.05	1.9	1.46	14.7	9.86	Control group
287	F	58	101309968	12.5	253	372	11.9	3.15	2.1	116	3.46	4.59	4.37	36.8	8.73	Control group
288	F	59	101309742	45.2	486	448	22.1	2.35	3.85	96.7	12.5	7.92	4.08	69	4.94	Control group
289	M	44	101310295	8.4	228	284	10.2	2.21	2.27	93.6	3.85	5.88	3.65	31.9	7.4	Control group
290	F	45	101310402	27	442	598	18.1	2.68	6.66	141	3.23	6.14	4.93	39.1	11.22	Control group
291	M	59	101043161	19.2	184	620	5.4	1.65	3.41	222	3.41	8.12	10.3	43.8	14.06	Control group
292	F	77	101311043	52.3	428	610	24.8	4.71	3.93	159	5.8	9.1	6.3	32.1	10.86	Control group
293	M	50	101311103	10.5	191	218	14.4	1.37	2.5	64.8	4.96	5.69	1.97	21.8	6.11	Control group
294	F	51	101311375	8.05	114	123	6.06	0.71	0.842	22	1.34	1.38	0.873	13.9	6.46	Control group
295	M	38	101311535	13.2	208	197	8.52	1.66	1.3	43.1	1.25	2.63	1.61	11.2	10.31	Control group
296	F	43	101311701	5.94	66.7	91.9	3.48	2.23	0.576	28.1	2.06	1.24	0.594	9.14	7.72	Control group
297	M	79	407782	16.7	281	246	8.65	1.54	3.29	26.2	1.4	1.88	1.25	11.3	11.84	Control group
298	M	39	101311865	16.9	226	172	10.4	1.49	1.66	36.5	0.929	1.86	1.75	12.6	8.21	Control group
299	F	48	101312473	2.75	237	323	20.8	1.72	4.13	70.9	7.53	6.76	4.11	34.2	5.77	Control group
300	M	68	101152096	10.8	181	169	5.01	1.89	2.48	33.2	1.38	3.06	1.97	11.7	9.74	Control group
301	M	59	101313108	26.9	355	333	13.3	1.42	5.81	122	5.76	3.94	3.31	37.4	7.61	Control group
302	F	59	101313902	22.1	360	338	16.6	3.48	4	48	3.09	4.47	2.65	22.9	8.33	Control group
303	M	54	101194755	11.7	261	268	15.8	2.95	2.86	25.8	2.73	3.04	1.36	13.9	8.4	Control group
304	M	46	101314466	13	269	308	16.8	2.45	2.21	45.1	5.48	5.31	1.96	42.3	5.12	Control group
305	F	62	101314788	38.4	692	617	22.8	3.61	7.61	74.4	3.15	5.37	6.95	40.8	9.73	Control group
306	M	36	101281343	14.5	199	281	7.65	6.48	3.82	35.9	10.1	2.26	7.67	8.86	11.47	Control group
307	M	37	101315587	36.3	416	313	18.8	5.46	3.42	53.6	4.07	5.58	2.37	19.7	7.78	Control group
308	M	42	101315899	19	363	346	11.6	1.96	4.16	57.8	2.48	4.23	2.58	31	8.28	Control group
309	M	51	101171810	11	179	196	6.15	2.49	1.5	50.6	3.56	3.52	3.28	26.3	6.38	Control group
310	M	39	101148501	4.36	152	229	14.8	1.54	1.98	31.9	5.24	2.41	2.62	22.1	5.95	Control group
311	M	45	101185374	6.44	134	159	11.5	2.85	1.09	29.5	2.89	3.07	0.919	13.7	6.17	Control group
312	M	30	101318931	16.8	335	270	11.4	2.72	1.86	38.3	1.69	3.5	1.39	21.5	8.2	Control group
313	F	36	101318742	22.7	292	259	12.5	1.7	2.54	45.1	1.75	2.91	1.38	18.9	8.52	Control group
314	M	55	101320197	20	343	305	17.9	2.16	2.4	26.8	1.47	3.34	1.18	12.5	9.52	Control group
315	F	62	101319684	32.5	274	339	16.2	3.51	2.21	83.9	5.89	7.05	3.03	22.6	8.3	Control group
316	M	41	101322130	13.8	217	180	7.8	2.72	1.37	42.7	2.05	2.83	1.54	14.2	8.44	Control group
317	M	35	101321785	11	186	270	14.2	2.76	2.08	72.6	4.95	5.46	2.91	25.5	6.95	Control group
318	M	39	101324303	5.54	200	210	25.2	4.21	2.59	52.6	6.85	5.29	2.1	24.9	4.32	Control group
319	F	56	101305917	19.5	432	396	23.7	3.38	3.91	61.6	4.37	6.39	2.62	37.5	6.44	Control group
320	F	49	101307006	23.6	379	334	21.4	3.02	3.35	24.8	1.28	3.17	2.06	10.9	9.9	Control group
321	M	36	101310016	16.1	318	569	20.1	2.33	2.42	211	9.24	8.34	3.38	57.6	8.25	Control group
322	F	55	101310691	18.1	346	281	17.8	2.51	3.41	32.5	1.4	3.28	1.6	10.2	9.72	Control group
323	F	37	101311076	21.7	219	347	11.6	1.96	3.7	77.3	2.65	5.48	2.43	29.2	8.76	Control group
324	M	74	101311580	24.8	384	280	15.6	1.71	2.92	22.5	0.549	1.56	1.12	9.01	11.43	Control group
325	F	66	101119979	28.3	589	593	47.6	8.46	6.73	127	11.8	12.3	4.2	70.2	5.16	Control group
326	M	75岁	0000321112	10.7	379	400	8.95	1.23	2.71	6.7	0.436	0.528	0.255	1.71	35.12	Control group
327	M	66岁	0000321943	17	190	190	8.1	2	1.1	11	0.52	0.97	0.42	4.7	14.24	Control group
328	F	70岁	0000326191	13.2	256	258	20.8	2.97	1.72	10.6	0.703	1.68	0.632	5.96	9.34	Control group
329	F	54岁	0000340677	15	200	150	33	1.2	1.5	10	0.86	0.61	0.271	4.7	4.13	Control group
330	F	64岁	0000352099	38.3	243	177	8.48	1.45	1.01	10	3.22	2.06	0.49	7.24	9	Control group
331	M	64岁	0000352940	38	508	457	16.6	5.26	4.5	20.7	1.17	2.03	0.64	7.78	17.53	Control group
332	M	38岁	0000375338	18.2	278	184	8.1	2.78	1.06	7.71	1.04	1	0.157	4.89	12.96	Control group
333	F	90岁	0000384225	20.9	201	102	7.13	0.552	3.65	9.29	0.391	0.56	0.513	2.35	10.77	Control group
334	M	74岁	0000389602	20.8	189	162	8.44	1.66	0.836	9.57	1.03	0.851	0.247	4.32	11.85	Control group
335	M	70岁	0000391594	25.8	327	286	11.9	2.45	0.602	8.96	0.755	0.218	0.522	3.74	17.35	Control group
336	F	69岁	0000393370	5.91	102	60.7	2.08	0.443	0.53	5.54	1.52	0.687	0.214	5.65	6.74	Control group
337	F	82岁	0000394484	5.32	110	68.7	2.08	0.306	0.488	2.83	0.373	0.466	0.763	1.89	15.02	Control group
338	F	64岁	0000399322	30.4	442	381	15.1	3.77	2.78	11.8	0.518	1.05	0.31	4.37	18.87	Control group
339	F	83岁	0000400867	28.9	307	163	10.2	1.6	4.84	6.67	0.69	0.991	0.4	4.4	10.56	Control group
340	F	79岁	0000403171	14.4	192	160	10.4	4.63	0.813	5.44	0.736	0.805	0.352	2.99	11.43	Control group
341	M	71岁	0000406287	4.02	62	49.3	1.93	0.811	0.489	6.89	0.537	0.496	0.123	2.15	11.19	Control group
342	M	77岁	0000414455	13.9	213	122	4.61	0.758	2.35	3.53	0.257	0.872	0.649	3.02	14.45	Control group
343	M	75岁	0000416936	27.5	382	316	20.2	2.32	0.723	11.6	1.04	0.819	0.182	2.98	13.18	Control group
344	F	61岁	0000417258	4.68	138	113	2.82	0.813	1.61	6.11	0.507	0.718	0.204	4.18	14.61	Control group
345	M	57岁	0000422747	32	398	425	14.7	2.81	0.785	4.39	0.386	0.997	0.214	3.35	22.26	Control group
346	M	48岁	0000426042	3.26	45.6	44.3	2.35	0.353	0.239	4.49	0.557	0.303	0.2	2.97	7.97	Control group
347	F	65岁	0000428196	18.7	289	200	10.2	1.68	2.31	13.8	1.04	1.04	0.296	5.5	12.15	Control group
348	M	46岁	0000429732	10.6	155	245	22.8	3.3	0.241	5.43	0.861	0.112	0.232	2.72	9.43	Control group
349	M	69岁	0000442058	1.7	34	25	1.2	0.44	0.28	5	0.33	0.21	0.48	0.82	11.95	Control group
350	F	55岁	0000444776	14.7	236	215	8.5	1.3	0.849	6.6	1.04	1.35	0.533	5.34	13.75	Control group

## Sheet: 5月
									检测结果
样本姓名	性别	年龄	住院号	病区	床位号	条形码编号	送检医生	检测日期	十六碳一烯酸（C16：1）	十八碳一烯酸（C18：1）	十八碳二烯酸（C18：2）	α-十八碳三烯酸（α-C18：3）	γ-十八碳三烯酸（γ-C18：3）	二十碳一烯酸（C20：1）	二十碳四烯酸（C20：4）	二十碳五烯酸（C20：5）	ω-3-二十二碳五烯酸（ω-3-C22：5）	ω-6-二十二碳五烯酸（ω-6-C22：5）	二十二碳六烯酸（C22：6）	AA/DHA	AA/EPA	ω-6/ω-3
徐爱忠	男	50	0101125712	日间病房	20	1008677363	卢岑	2019.05.05	4.58	87.2	87.5	5.11	0.538	1.01	24.5	1.52	1.81	0.975	9.14	2.68053	16.1184	6.45694
郑章锦	男	75	0101299676	日间病房	15	1008677561	卢岑	2019.05.05	7.96	100	159	6.5	0.84	0.929	16.9	0.508	1.38	0.918	13.5	1.25185	33.2677	8.11668
史启翔	男	71	0101299690	日间病房	17	1008678468	卢岑	2019.05.05	7.8	76.9	73.1	2.41	1.33	0.634	20.1	1.42	1.59	1.21	8.58	2.34266	14.1549	6.83857
陈杨	女	64	0101297773	日间病房	7	1008680290	卢岑	2019.05.05	22.4	266	203	17.9	1.61	3.73	48.2	3.31	3.82	1.84	18.6	2.5914	14.5619	5.83658
曲翠兰	女	68	0000383650	日间病房	5	1008682742	卢芩	2019.05.08	9.67	140	129	4.97	1.42	1.21	41.6	1.82	2.8	1.99	19.4	2.14433	22.8571	6.00241
汪青	女	46	0101299888	日间病房	8	1008685171	卢芩	2019.05.08	18.1	307	230	14.6	2.02	4.19	33.2	3.14	3.86	1.4	23.4	1.4188	10.5732	5.92489
杨秋明	男	26	0101075416	日间病房	26	1008684399	卢芩	2019.05.08	14.5	243	231	15.4	2.34	3.02	40.3	2.01	3.17	1.8	19	2.12105	20.0498	6.95907
朱林娣	女	71	0101272071	日间病房	10	1008685892	卢芩	2019.05.08	36.1	444	362	28.3	4.78	3.67	67.9	3.76	6.84	3.39	24.2	2.80579	18.0585	6.94247
萨拉	男	30	0101248312	日间病房	19	1008686748	卢芩	2019.05.08	27.4	333	232	13.4	4.57	1.83	53.5	3.14	4.76	3.09	20.7	2.58454	17.0382	6.98
万益萍	女	51	0101249020	日间病房	13	1008686423	卢芩	2019.05.08	24.4	278	192	16.7	1.4	4.26	41.5	21.3	5.47	1.48	47.7	0.870021	1.94836	2.59274
戴正奎	男	73	0101291483	502消化2	23	1008687436	刘娟	2019.05.08	54.4	446	339	18.9	4.63	4.22	52.3	5.67	6.1	2.03	26.5	1.97358	9.22399	6.96099
高立华	女	71	0101299822	502消化2	33	1008686688	刘娟	2019.05.08	16.6	162	93.4	5.03	0.941	1.57	30.2	1.07	3.01	1.45	10.1	2.9901	28.2243	6.55862
冯才贵	男	81	0101151758	502消化2	10	1008689552	刘娟	2019.05.08	4.18	86.1	89.3	2.73	0.685	0.719	40.4	0.385	1.31	1.66	7.56	5.34392	104.935	11.0175
宋爱霞	女	47	0101300017	日间病房	11	1008688292	卢芩	2019.05.08	15.7	227	158	14.9	2.26	2.38	40.1	2.37	3.42	1.41	19.4	2.06701	16.9198	5.03293
陈美华	女	61	0101300092	日间病房	12	1008691507	卢芩	2019.05.08	68.1	772	608	64.3	7.78	7.05	71.7	8.2	8.71	2.82	37.6	1.90691	8.7439	5.81012
郭焕宁	女	43	0101298861	日间病房	27	1008695562	卢芩	2019.05.08	33.2	463	364	22	3.37	4.33	39.6	1.2	3.45	2.17	13.5	2.93333	33	10.1903
胡才欣	男	87	0000439642	日间病房	16	1008696764	卢芩	2019.05.08	37.5	357	270	8.13	1.59	2.67	32.4	3.74	3.01	1.33	19.5	1.66154	8.6631	8.88074
万英	女	70	0101295521	501消化1	20	1008697177	俞谦	2019.05.08	34.1	389	293	13.9	4.6	2.38	40.9	2.71	3.44	2.73	20.2	2.02475	15.0923	8.47776
李容	女	61	0000428138	日间病房	1	1008694797	卢芩	2019.05.08	46	627	380	20.7	4.48	4.38	59.7	1.63	3.86	4.24	19.1	3.12565	36.6258	9.90108
韩秀兰	女	71	0101200772	日间病房	28	1008698500	卢芩	2019.05.08	28.8	380	322	17.5	2.39	2.32	41.1	1.61	3.05	2.09	14.5	2.83448	25.528	10.0267
杜永梅	女	42	0101300311	日间病房	31	1008699172	卢芩	2019.05.08	12.4	201	210	6.47	1.22	1.78	33.6	3.04	2.27	1.13	17.2	1.95349	11.0526	8.48689
吴赵铎	男	61	0101300371	日间病房	22	1008700630	卢芩	2019.05.08	7.56	158	227	21.6	3.1	1.52	31.6	1.12	1.8	1.11	8.7	3.63218	28.2143	7.9112
梁冰	男	61	0101300383	日间病房	25	1008700834	卢芩	2019.05.08	24.6	336	299	23.6	3	2.74	53.9	2.43	2.51	0.906	13.9	3.8777	22.1811	8.4073
刘红	女	70	0000381866	日间病房	27	1008701612	卢芩	2019.05.08	10.7	174	127	6.62	0.947	1.25	49.8	5.68	2.99	0.908	16.6	3	8.76761	5.60223
李敬秀	女	63	0101300244	日间病房	30	1008697745	卢芩	2019.05.08	12.2	239	219	11	1.26	2.37	68.7	2.14	5.39	4.17	21.2	3.24057	32.1028	7.37805
马云峰	男	43	0101300213	日间病房	17	1008697742	卢芩	2019.05.08	35.5	276	289	14.9	2.42	2.13	40.1	1.65	3.96	1.34	20.1	1.99502	24.303	8.1965
许每虹	女	80	0101034586	502消化2	32	1008706778	刘娟	2019.05.08	40	586	435	30	1.35	4.62	45.7	6.92	5.15	2.67	34.5	1.32464	6.60405	6.33042
夏建新	男	56	0101300448	日间病房	20	1008704536	卢芩	2019.05.08	14.9	214	205	8.16	1.04	2.19	41.2	9.78	3.47	1.2	32.3	1.27554	4.21268	4.62558
刘步旭	男	61	0101169456	日间病房	18	1008708459	卢芩	2019.05.08	38.4	524	365	31.2	3.43	7.2	86	7.15	6.76	2.91	39.1	2.19949	12.028	5.43095
钱伟	男	57	0101249053	日间病房	32	1008708293	卢芩	2019.05.08	21.9	371	342	21.7	4.53	3.01	103	7.64	6.99	4.27	45.5	2.26374	13.4817	5.54564
龚长娣	女	37	0101300483	日间病房	12	1008709020	卢芩	2019.05.08	24.5	416	326	25.4	2.37	2.96	42.4	3.1	4.39	1.53	30.5	1.39016	13.6774	5.87317
谢国良	男	48	0101300619	日间病房	29	1008714142	卢芩	2019.05.10	28.3	484	294	23.4	3.43	5.23	39.3	3.06	3.77	1.79	12.7	3.09449	12.8431	7.88539
范进	男	52	0101300681	日间病房	32	1008713786	卢芩	2019.05.10	8.39	188	145	4.08	0.395	2.31	29.6	0.996	1.68	1.12	7.6	3.89474	29.7189	12.2677
缪明烽	男	49	0101159241	日间病房	5	1008709329	卢芩	2019.05.10	14.3	218	179	14.8	2.32	2.25	41.1	2.18	2.31	1.13	13.4	3.06716	18.8532	6.83848
苏洪根	男	52	0101300426	日间病房	27	1008713407	卢芩	2019.05.10	6.11	92.1	178	3.83	1.02	0.839	28.2	0.587	1.3	1.16	7.61	3.70565	48.0409	15.6359
徐家喜	男	59	0000405452	日间病房	19	1008709764	卢芩	2019.05.10	47.8	348	314	10.9	1.93	2.86	53.4	3.89	3.87	2.56	26.8	1.99254	13.7275	8.1806
刘振银	男	64	0101242996	日间病房	33	1008713798	卢芩	2019.05.10	18.2	293	250	17.5	0.998	3.88	39.2	1.53	2.67	2.27	19.9	1.96985	25.6209	7.03048
李国文	女	79	0101300667	日间病房	9	1008714114	卢芩	2019.05.10	16.4	158	218	5.21	1.04	1.19	34.3	0.539	1.36	2.59	9.44	3.63347	63.6364	15.465
梁劲	女	68	0101300802	日间病房	13	1008718141	卢芩	2019.05.10	21	250	259	15.7	2.54	2.15	55.7	3.89	3.96	3.3	16.7	3.33533	14.3188	7.96373
陈旺强	男	48	0101300677	日间病房	3	1008718091	卢芩	2019.05.10	25.9	466	291	20.1	2.09	4.78	39.6	3.56	2.96	1.49	20.1	1.97015	11.1236	7.15283
赵明广	男	54	0000418624	日间病房	29	1008716713	卢芩	2019.05.10	12.1	216	325	12.1	1.58	1.56	31.1	0.998	2.18	1.1	11.9	2.61345	31.1623	13.2011
许如霞	女	63	0101300951	日间病房	10	1008724750	卢芩	2019.05.10	22.5	486	559	16.3	3.99	3.19	46.1	1.22	2.95	2.27	12.3	3.74797	37.7869	18.6561
王泽会	女	51	0101301460	501消化1	42	1008742281	俞谦	2019.05.15	32.7	363	366	13.6	4.39	4.28	118	4.17	6.99	6.27	37.4	3.15508	28.2974	7.95785
罗玉华	女	55	0101301607	日间病房	32	1008747636	卢芩	2019.05.15	29.9	373	391	20.4	4.78	2.84	179	10.1	10.5	5.82	51.5	3.47573	17.7228	6.27676
陈木娥	女	65	0101287808	日间病房	19	1008745763	卢芩	2019.05.15	16.8	444	445	17.8	9.52	4.82	159	6.07	6.35	5.57	43.8	3.63014	26.1944	8.36382
魏爱娣	女	62	0101301425	日间病房	18	1008741788	卢芩	2019.05.15	48	551	519	22.4	2.4	4.57	134	6.87	7.47	5.38	56.2	2.38434	19.5051	7.10975
蒋伟	女	49	0101301527	日间病房	26	1008746413	卢芩	2019.05.15	25.7	291	383	9.57	6.35	2.54	116	6.41	6.37	6.09	46.3	2.5054	18.0967	7.44996
魏红军	男	55	0000413593	日间病房	11	1008741491	卢芩	2019.05.15	5.42	150	399	13.1	0.799	2.23	59.4	2.73	4.04	2.08	31	1.91613	21.7582	9.0678
陈鸿铭	男	68	0101300857	日间病房	9	1008745964	卢芩	2019.05.15	15.2	333	447	8.08	1.96	3.17	184	10.3	7.73	6.42	62.5	2.944	17.8641	7.21566
孙利梅	女	50	0101300700	日间病房	17	1008741499	卢芩	2019.05.15	15.9	357	412	27.6	3.53	3.23	85.7	3.69	6.64	4.06	45.7	1.87527	23.2249	6.04197
肖盈盈	女	35	0101301374	日间病房	20	1008741507	卢芩	2019.05.15	25.6	399	519	13.1	2.9	4.11	218	13.5	12.7	5.43	82.9	2.62967	16.1481	6.09926
彭珍美	女	68	0101149322	日间病房	22	1008746081	卢芩	2019.05.15	28.7	691	472	28.3	9.2	7.01	165	26	14	5.2	62.2	2.65273	6.34615	4.99157
张锦辉	男	59	0101282339	日间病房	33	1008748858	卢芩	2019.05.15	8.63	326	434	8.64	1.76	2.97	97.8	5.81	3.85	3.2	31.7	3.08517	16.833	10.7352
钱芽子	女	65	0101301673	日间病房	29	1008749778	卢芩	2019.05.15	38.7	666	525	22.4	2.96	7.41	224	10.7	11.7	9.28	73.4	3.05177	20.9346	6.44027
汪建垚	男	43	0101153942	日间病房	2	1008751352	卢芩	2019.05.15	40	584	593	24.4	2.37	7.29	126	14.6	7.87	3.05	48.2	2.61411	8.63014	7.61986
钱锦辉	男	50	0101301531	日间病房	1	1008751350	卢芩	2019.05.15	47.1	591	485	24.9	2.4	4.92	92.3	10.6	10.3	3.55	67.1	1.37556	8.70755	5.16608
谢正和	男	71	0101301598	日间病房	31	1008755911	卢芩	2019.05.15	10.5	219	257	7.4	1.94	3.73	48.1	2.87	4.56	1.61	27.5	1.74909	16.7596	7.29152
王伯鸿	男	71	0101124381	日间病房	27	1008759168	卢芩	2019.05.15	53.4	553	401	16.3	6.26	6.71	67.2	5.01	9.86	5.37	39.7	1.6927	13.4132	6.77057
郁秀玲	女	38	0101300931	日间病房	29	1008759102	卢芩	2019.05.15	23.5	461	376	20.6	2.35	7.38	36.2	1.12	4.47	2.73	30.5	1.18689	32.3214	7.36073
阎光琴	女	71	0101301650	日间病房	23	1008758234	卢芩	2019.05.15	21.3	371	243	16	2.24	7.39	38.7	5.75	5.46	1.8	36.4	1.06319	6.73043	4.49206
曹燕	女	40	0101200286	日间病房	30	1008759745	卢芩	2019.05.15	29.4	641	430	42.9	2.81	9.67	67.4	3.9	6.85	3.48	43	1.56744	17.2821	5.21148
陈修毕	男	70	0101301958	502消化2	48	1008760229	陈洪	2019.05.15	46.3	644	229	39	2.42	46.1	40.9	3.73	5.71	2.07	25.7	1.59144	10.9651	3.70097
李顺宝	男	77	0101085397	502消化2	21	1008759603	陈洪	2019.05.15	4.52	116	151	4.15	1.07	2.57	50.7	3.52	5.87	2.52	19.5	2.6	14.4034	6.21338
张秀琴	女	55	0101248907	日间病房	29	1008760182	卢芩	2019.05.15	39.4	934	509	26.9	4.99	11.6	87.6	3.56	9.65	4.97	41.3	2.12107	24.6067	7.45068
高华	男	53	0101289383	日间病房	33	1008758264	卢芩	2019.05.15	26.7	580	355	19.2	3.84	7.47	83.5	4.08	6.44	4.29	30.5	2.7377	20.4657	7.41664
王得玉	男	74	0101293137	日间病房	31	1008761470	卢芩	2019.05.15	37.8	778	572	23.9	1.58	14.2	60.4	0.989	5.48	4.2	31.1	1.94212	61.0718	10.3821
王红梅	女	39	0101302143	日间病房	31	1008767662	卢芩	2019.05.15	19.5	411	404	22.7	3.12	4.51	67	4.49	6.5	4.27	37.5	1.78667	14.922	6.7199
俞美霞	女	63	0101302085	日间病房	20	1008766257	卢芩	2019.05.15	30.9	636	548	25.4	3.34	9.65	71.7	3.61	7.55	3.39	36	1.99167	19.8615	8.63327
蔡小青	女	61	0101081514	日间病房	17	1008766248	卢芩	2019.05.15	13.2	212	224	38.4	4.97	2.48	46.6	11.7	6.96	1.56	21.5	2.16744	3.98291	3.52762
余传宝	男	67	0101301825	502消化2	16	1008761479	陈洪	2019.05.15	31.8	438	236	4.72	1.57	8.16	65.5	2.3	6.47	3.84	26.2	2.5	28.4783	7.73268
钱圣清	男	71	0101133125	日间病房	3	1008769462	卢芩	2019.05.17	26.1	467	424	21.9	3.68	3.97	29.6	1.04	2.83	1.62	11.3	2.61947	28.4615	12.3793
茆建明	男	52	0101059786	日间病房	10	1008769705	卢芩	2019.05.17	13.9	286	274	9.42	2.34	2.9	30.2	1.26	1.92	1.3	11.2	2.69643	23.9683	12.9345
刘亚男	男	41	0101302273	日间病房	11	1008773932	卢芩	2019.05.17	4.78	126	106	7.88	1.16	1.64	31.3	1.23	2.24	1.27	12.8	2.44531	25.4472	5.78592
江凯	男	40	0101146720	502消化2	11	1008778313	陈洪	2019.05.18	30.8	363	348	11.1	2.36	3.65	75.3	1.48	4.3	2.46	23	3.27391	50.8784	10.7352
崔鹏	女	41	0101302517	日间病房	10	1008783396	卢芩	2019.05.18	11.5	188	364	28	3.38	2.73	102	9.78	5.89	3.43	32.9	3.1003	10.4294	6.17487
叶永才	男	76	0000347191	日间病房	9	1008783016	卢芩	2019.05.18	13.1	245	244	10.6	1.86	2.37	59	2.1	3.83	3.83	26.4	2.23485	28.0952	7.19054
张守莲	女	72	0101086663	日间病房	17	1008796545	卢芩	2019.05.22	48.7	507	436	34.5	4.43	4.74	65.2	5.14	6.97	3.51	42.9	1.51981	12.6848	5.68808
陈敬荣	男	47	0101302828	日间病房	21	1008796329	卢芩	2019.05.22	5.71	172	210	11	1.38	2.24	45.8	1.67	2.48	1.86	10.3	4.4466	27.4251	10.1784
魏文丽	女	47	101302829	日间病房	16	1008796034	卢芩	2019.05.22	5.76	149	184	4.74	0.405	1.73	61.6	7.84	4.75	3.31	43.7	1.40961	7.85714	4.08512
杨爱金	男	51	0101302734	日间病房	26	1008792384	卢芩	2019.05.22	15.9	231	278	13.5	2.11	2.47	59.8	2.16	4.18	4.12	27.1	2.20664	27.6852	7.32914
王宝兰	女	60	0101301936	日间病房	20	1008791423	卢芩	2019.05.22	23.4	513	430	18.9	3.78	3.89	61.3	2.89	4.28	3.75	31.5	1.94603	21.2111	8.66476
张义龙	男	41	0101302792	日间病房	12	1008796932	卢芩	2019.05.22	23.7	293	291	16.3	4.28	2.32	90.7	13	7.07	3.76	31.6	2.87025	6.97692	5.734
王强	男	55	0101302811	502消化2	55	1008798073	陈洪	2019.05.22	17.7	308	278	13.5	2.29	2.84	43.6	4.4	3.49	1.39	20.8	2.09615	9.90909	7.70988
赵爱明	女	47	0101302833	日间病房	3	1008797177	卢芩	2019.05.22	7.04	157	148	7.36	0.828	1.8	71.5	2.59	2.87	2.48	26.1	2.73946	27.6062	5.72477
张国亮	男	65	0101266069	日间病房	13	1008797699	卢芩	2019.05.22	62.4	681	476	30.2	7.08	9.16	117	8.78	11	5.62	35.5	3.29577	13.3257	7.08587
万脂明	男	66	0101044739	日间病房	23	1008798676	卢芩	2019.05.22	9.92	355	321	13.4	1.41	5.59	64.5	2.49	3.97	2.53	22.6	2.85398	25.9036	9.17193
雍万凤	女	67	0101184087	502消化2	46	1008800215	陈洪	2019.05.22	37.7	489	253	22.5	1.88	7.64	64.7	5.58	7.44	2.58	24.6	2.63008	11.595	5.35862
唐玮	女	37	0101303004	日间病房	30	1008799898	卢芩	2019.05.22	42.5	375	326	18.3	3.41	3.91	67.1	2.8	5.04	5.23	29.1	2.30584	23.9643	7.27263
陈玉清	女	68	0101303056	502消化2	45	1008802133	陈洪	2019.05.22	13.1	201	279	9.47	2.43	2.52	53.6	2.94	4.33	4.59	36.4	1.47253	18.2313	6.39104
任春生	男	61	0101075058	502消化2	2	1008802895	陈洪	2019.05.22	13.9	266	196	16.4	1.86	3.38	62.7	9.94	7.19	2.36	69.6	0.900862	6.30785	2.5494
杨桂华	女	73	0101068583	501消化1	23	1008803011	李明	2019.05.22	11.3	260	290	8.12	2.94	2.31	58.7	3.59	5.51	2.67	27.4	2.14234	16.351	7.94061
赵克华	男	69	0000406287	日间病房	33	1008807355	卢芩	2019.05.22	11.3	260	290	8.12	2.94	2.31	58.7	3.59	5.51	2.67	27.4	2.14234	16.351	7.94061
蒋文凤	女	57	0101154755	日间病房	32	1008806816	卢芩	2019.05.22	13	340	312	17	2.19	4.92	75.8	3.57	5.48	4.06	35.2	2.15341	21.2325	6.43347
邹永珍	女	78	0101029365	日间病房	2	1008807347	卢芩	2019.05.22	3.5	86.2	137	2.55	0.757	1.1	71.8	2.14	3.37	2.26	32.7	2.19572	33.5514	5.19669
钟琰	女	40	0101303130	日间病房	18	1008808162	卢芩	2019.05.22	6.31	175	139	7.26	0.765	2.67	46.4	2.15	2.59	2.01	19.1	2.42932	21.5814	6.05064
王者伦	男	69	0101303169	501消化1	43	1008809436	李明	2019.05.22	3.44	80	101	2.64	0.537	1.32	79.3	7.54	3.58	3.49	25.8	3.07364	10.5172	4.65943
孙品华	男	87	0101302928	日间病房	22	1008806498	卢岑	2019.05.22	35.3	336	263	12.5	2.83	2.91	66.6	1.53	2.89	2.29	18.3	3.63934	43.5294	9.50369
刘军	男	23	0101302985	日间病房	27	1008809419	卢岑	2019.05.22	12.9	190	193	10.5	3.21	1.97	57.1	6.98	4.57	2.04	22.8	2.50439	8.18052	5.69342
方本霞	女	48	0101303132	日间病房	1	1008808604	卢岑	2019.05.22	6.3	235	276	12.4	2.21	2.13	45.7	0.966	2.61	2.4	17.8	2.56742	47.3085	9.661
毛国祥	男	43	0101193765	日间病房	13	1008810745	卢岑	2019.05.22	2.43	40.7	70	1.82	0.313	0.825	49.8	1.82	3.19	1.82	19.6	2.54082	27.3626	4.61343
汤美芳	女	77	0101303276	日间病房	27	1008815036	卢岑	2019.05.22	21.8	298	246	18.7	2.38	2.87	38.1	4.37	5.06	2	45.7	0.833698	8.71854	3.90735
张家勇	男	64	0101043141	日间病房	26	1008815236	卢岑	2019.05.22	15.7	343	372	13.4	3.55	3.26	44.6	1.99	3.55	2.46	21.8	2.04587	22.4121	10.3733
汪慧琴	女	61	0101128787	日间病房	17	1008811044	卢岑	2019.05.22	3.84	78	135	3.16	1.02	1.26	65.6	2.86	5.18	2.94	30.8	2.12987	22.9371	4.87048
寇志来	男	59	0101143176	日间病房	8	1008816006	卢岑	2019.05.24	23.9	232	243	10.2	3.19	1.51	59.8	5.29	6.12	2.56	30.7	1.94788	11.3043	5.89849
郑宁桥	男	54	0101303337	日间病房	21	1008816207	卢芩	2019.05.24	12	303	286	8.96	2.23	2.27	47	3.2	2.56	1.98	22	2.13636	14.6875	9.18328
谷顺英	女	72	0101156861	502消化2	33	1008819160	陈洪	2019.05.24	18	415	415	19.1	2.76	3.64	50.4	1.97	3.1	2.98	27.4	1.83942	25.5838	9.13593
汪传月	女	44	0101303460	日间病房	16	1008819317	卢芩	2019.05.24	11.5	206	291	9.1	1.72	1.81	58.4	1.12	2.8	3.83	16.5	3.53939	52.1429	12.0241
王翠霞	女	60	0101303185	日间病房	28	1008823446	卢芩	2019.05.24	29.5	339	328	23.8	5.88	1.98	69.2	7.68	5.74	3.34	35.9	1.92758	9.01042	5.55826
金华	女	70	0101303560	日间病房	27	1008823438	卢芩	2019.05.24	19.6	599	428	29.4	4.41	5.44	31.4	0.688	2.91	1.97	11.5	2.73043	45.6395	10.4674
孙奎	男	64	0101302875	502消化2	10	1008819638	陈洪	2019.05.24	26.2	418	405	16.2	1.98	4.05	58.1	5.98	3.73	2.59	43.1	1.34803	9.71572	6.77684
李文宝	男	61	0101303184	502消化2	22	1008820534	陈洪	2019.05.24	21.9	353	259	11.7	2.32	2.72	56	1.57	2.2	1.65	15.4	3.63636	35.6688	10.3327
朱继芳	女	68	0101295493	日间病房	32	1008824622	卢芩	2019.05.24	28.4	410	291	19.7	2.13	4.9	40.4	4.71	5.2	1.45	21.7	1.86175	8.57749	6.52855
耿七斤	男	68	0101298252	日间病房	13	1008824602	卢芩	2019.05.24	23.1	316	262	16.6	1.26	3.14	63.7	3.22	4.05	3.23	28.4	2.24296	19.7826	6.31701
陈学庆	男	64	0101240835	502消化2	12	1008824766	陈洪	2019.05.24	26.5	401	291	21	2.21	4.96	49.4	2.85	3.97	2.18	21.1	2.34123	17.3333	7.04804
王毅	男	47	0101303612	日间病房	31	1008825200	卢芩	2019.05.24	6.22	122	155	4.73	1.22	1.52	56.2	1.84	2.47	2.01	18.2	3.08791	30.5435	7.87188
陈金福	男	59	0101303617	日间病房	33	1008826725	卢芩	2019.05.24	16.1	302	303	18.4	4.37	3.37	57	3.18	4.45	2.49	21.8	2.61468	17.9245	7.67008
柯骏	男	74	0000403817	502消化2	22	1008828642	陈洪	2019.05.26	20.6	503	404	25.1	3.65	3.67	65.1	2.95	3.21	1.19	20.5	3.17561	22.0678	9.15649
胡传霞	女	57	0101303241	502消化2	31	1008829106	尹莹	2019.05.26	4.96	117	184	9.42	2.71	0.859	39.8	1.56	2.4	1.72	17.6	2.26136	25.5128	7.36701
梅月琴	女	82	0000365853	502消化2	35	1008833295	陈洪	2019.05.26	27.9	730	636	16.5	4.94	9.15	124	8.69	7.76	3.04	50.5	2.45545	14.2693	9.20288
李靖	男	51	0101243122	502消化2	17	1008833979	陈洪	2019.05.26	15.4	366	307	10.4	1.12	1.78	56.7	1.35	2.91	1.98	21.9	2.58904	42	10.0328
庄云	女	60	0101304066	日间病房	18	1008846410	卢芩	2019.05.29	25	485	366	11.8	1.57	4.86	64.9	2.52	4.47	3.03	53.6	1.21082	25.754	6.01602
高智强	男	40	0101304062	日间病房	21	1008846628	卢芩	2019.05.29	6.85	155	204	6.23	1.94	1.75	58	2.96	3.12	1.82	21.4	2.71028	19.5946	7.88371
吴德平	男	59	0101183151	日间病房	12	1008846824	卢芩	2019.05.29	8.25	277	260	8.67	1.99	2.39	52.6	1.11	2.7	1.54	31.5	1.66984	47.3874	7.18804
沈巧芸	女	54	0101303833	日间病房	16	1008846007	卢芩	2019.05.29	8.58	137	163	6.41	1.69	0.761	46.8	4.46	3.24	1.18	32.6	1.43558	10.4933	4.55299
王竹卿	女	58	0101110790	日间病房	15	1008842533	卢芩	2019.05.29	38.7	338	299	17	4.64	2.18	53.2	10.6	6.17	2.11	58.7	0.906303	5.01887	3.8818
谢中洋	男	59	0101303798	日间病房	9	1008845999	卢芩	2019.05.29	4.87	113	136	5.38	1.17	0.775	34.1	1.86	2.03	1.13	18.8	1.81383	18.3333	6.14179
石贤权	男	46	0101304092	日间病房	25	1008847639	卢芩	2019.05.29	8.52	183	152	6.19	1.54	1.33	39.4	2.31	2.17	1.32	25.7	1.53307	17.0563	5.34122
戚朝玉	男	67	0101304078	日间病房	22	1008847202	卢芩	2019.05.29	12.6	326	180	18.8	1.1	8.57	34.9	1.73	2.41	1.67	20.1	1.73632	20.1734	5.05739
沈名强	男	47	0101302505	日间病房	31	1008848542	卢芩	2019.05.29	9.35	188	216	8.57	2.3	1.56	61.4	2.05	2.89	1.97	27.3	2.24908	29.9512	6.90198
马大勇	男	62	0101240564	日间病房	10	1008848022	卢芩	2019.05.29	4.64	101	129	2.91	1.23	0.696	50.2	1.14	1.76	2.02	14.8	3.39189	44.0351	8.8525
张敏	女	61	0101304091	日间病房	17	1008847624	卢芩	2019.05.29	9.5	191	183	4.95	1.19	2.27	45.6	4.33	2.83	1.58	29.7	1.53535	10.5312	5.53384
戴贤荣	男	56	0101303759	日间病房	32	1008849961	卢芩	2019.05.29	7.63	131	180	7.17	0.997	1.18	34.1	1.66	2.06	1.49	21.3	1.60094	20.5422	6.72839
肖茹	女	56	0000346326	日间病房	19	1008849933	卢芩	2019.05.29	18.5	365	325	15.1	2.07	2.53	42.3	1.93	2.61	2.02	23.7	1.78481	21.9171	8.56922
张银香	女	47	0101304256	日间病房	1	1008852145	卢芩	2019.05.29	4.95	96.7	141	6.4	1.52	0.838	46.2	3.28	2.23	1	25.1	1.84064	14.0854	5.12618
金阳	男	46	0101304169	日间病房	11	1008856064	卢芩	2019.05.29	6.6	170	183	6.33	1.21	1.26	52.1	1.78	2.7	1.46	20.4	2.55392	29.2697	7.61839
郑庆荣	男	62	0101304223	502消化2	47	1008853660	陈洪	2019.05.29	11.1	242	150	20.8	14.2	2.16	47.5	5.09	2.15	1.61	20.1	2.36318	9.33202	4.43103
陈卫民	女	62	0101304387	消化科2	32	1008857107	卢芩	2019.05.29	9.71	196	268	5.99	0.907	1.51	31.2	0.704	1.51	1.91	23.2	1.34483	44.3182	9.61715
曹风	女	57	0101101709	502消化2	33	1008857289	陈洪	2019.05.29	22.5	267	239	9.58	1.76	2.63	97.4	14.2	5.29	5.41	49.8	1.95582	6.85915	4.35616
颜洪海	男	51	0000383115	502消化2	43	1008857302	陈洪	2019.05.29	11.6	271	306	17.2	2.24	3.14	71.4	2.94	3.79	2.52	42.8	1.66822	24.2857	5.72696
吉娟娟	女	37	0101273028	日间病房	31	1008856808	卢芩	2019.05.29	14.1	215	228	10.4	1.34	1.78	57.2	2.34	3.22	2.24	27.1	2.1107	24.4444	6.70646
黄裕盛	男	21	0101228998	502消化2	45	1008853659	陈洪	2019.05.29	2.04	57.7	140	1.1	0.495	0.659	42.2	0.365	0.873	1.87	14.8	2.85135	115.616	10.7693
